1 **Insular holobionts: persistence and seasonal plasticity of the Balearic wall lizard (*Podarcis***  
2 ***lilfordi*) gut microbiota**

3

4 Laura Baldo<sup>1,2\*</sup>, Giacomo Tavecchia<sup>3</sup>, Andreu Rotger<sup>3</sup>, José Manuel Igual<sup>3</sup>, Joan Lluís Riera<sup>1</sup>

5

6 <sup>1</sup>Department of Evolutionary Biology, Ecology and Environmental Sciences, University of  
7 Barcelona, Spain

8 <sup>2</sup>Institute for Research on Biodiversity (IRBio), University of Barcelona, Barcelona, Spain

9 <sup>3</sup>Animal Demography and Ecology Unit, IMEDEA, CSIC-UIB, Esporles, Spain

10

11 **Corresponding Author:**

12 Laura Baldo

13 Department of Evolutionary Biology, Ecology and Environmental Sciences, University of  
14 Barcelona

15 Av. Diagonal, 643, 08028 Barcelona, Spain

16 email: [baldo.laura@ub.edu](mailto:baldo.laura@ub.edu)

17 phone: (+34) 9340 31375

18

19 **KEYWORDS:** within and among population diversity, 16S rRNA Illumina, sex, season, stable  
20 isotopes, fecal diet, plasticity, adaptation, island

21

22

23

24

25

26

27 **Abstract**

28 Integrative studies of animals and associated microbial assemblages (i.e., the holobiont) are rapidly  
29 changing our perspectives on organismal ecology and evolution. Islands provide ideal natural  
30 systems to understand the biogeographic patterns that shape these symbiotic associations, their  
31 resilience and plasticity over temporal and spatial scales, and ultimately their role in the host  
32 ecological adaptation. Here we used the Balearic wall lizard *Podarcis lilfordi* to address the  
33 diversification of the holobiont in an insular context by dissecting the drivers of the gut microbiota  
34 diversity within and across host allopatric populations. By extensive fecal sampling of individually  
35 identified lizards from three closed populations/islets in the South of Mallorca (Na Moltona, Na  
36 Guardis and En Curt) along two years and two seasons (spring and autumn), we sorted out the  
37 effect of islet, year, season, sex and partly life stage on the microbiota composition. We further  
38 related microbiota distances to host genetics and trophic ecology. Overall, the three populations  
39 showed a remarkable conservation of the major microbial taxonomic profile, while carrying their  
40 unique microbial signature at finer level of taxonomic resolution (Amplicon Sequence Variants  
41 (ASVs)). Microbiota distances across populations were compatible with both host genetics (as  
42 inferred by microsatellites) and trophic niche distances (as inferred by stable isotopes and fecal  
43 content). Within populations, a large proportion of ASVs (30-50%) persisted along the four  
44 sampling dates. Microbial diversity was driven by life stage and season, with no annual or sex  
45 effect. Seasonal changes within islets were mainly associated with fluctuations in the relative  
46 abundances of few bacterial taxa (mostly families Lachnospiraceae and Ruminococcaceae),  
47 consistently in both sampled years and without any major compositional turnover. These results  
48 support a large resilience of the major compositional aspects of the *P. lilfordi* gut microbiota over  
49 the short-term evolutionary divergence of their host allopatric populations (<10,000 years), but  
50 also suggest an undergoing process of parallel diversification of the holobiont. The cyclic seasonal  
51 fluctuations in gut microbiota composition hint to an important plasticity of these bacterial  
52 communities in response to the host annual physiological/metabolic shifts. The importance of these  
53 microbial community dynamics in the host ecology and dietary flexibility remains to be  
54 investigated.

55

56

## 57 **Introduction**

58

59 All organisms live in symbiosis with complex microbial communities (i.e., the host microbiota),  
60 which are known to exert fundamental biological functions for their host, effectively providing an  
61 extended phenotype for increased ecological adaptation (Alberdi et al., 2016; Henry et al., 2021).  
62 The host microbiota, and particularly those communities inhabiting the intestinal tract, known as  
63 gut microbiota, are known to affect a multitude of biological functions (Levin et al., 2021),  
64 including the host immune response (Thaiss et al., 2016), development (Warne et al., 2019),  
65 behavior (Rowe et al., 2020), thermal regulation (Huus & Ley, 2021), dietary preferences (Kohl  
66 et al., 2014; Leitão-Gonçalves et al., 2017), trophic niche amplitude (Kohl et al., 2016), digestion  
67 rates, and the overall efficiency in resource use (Lindsay et al., 2020). Collectively this indicates a  
68 critical role of the gut microbiota in forging the host ecology and influencing its evolutionary  
69 outcomes (Alberdi et al., 2016; Shapira, 2016). On the other hand, the gut microbiota structure  
70 itself is largely shaped by the host factors, including genotype, diet (Rojas et al., 2021; Youngblut  
71 et al., 2019), and geography (Levin et al., 2021), with results varying between captive and wild  
72 samples (Youngblut et al., 2019) and depending on the taxonomic scale of observation, both for  
73 microbes (from strain to phylum) and hosts (from individuals up to species and families) (Alberdi  
74 et al., 2021; Rojas et al., 2021).

75 Islands represent simplified models to study organismal adaptation due to their isolated nature,  
76 small population sizes (with no immigration or emigration events), reduced selective pressures,  
77 such as predation or food competitors, and smaller ecological networks (MacArthur & Wilson,  
78 1967), overall providing natural laboratories for dissecting the deterministic and stochastic  
79 mechanisms responsible of organismal diversification and fine-tune adaptation to their  
80 environments (Bittkau & Comes, 2005; Velo-Antó et al., 2012). These same critical aspects make  
81 islands a neat system also for integrative studies of both host and microbial associates (i.e., the  
82 holobiont) aimed to understand the coevolution of this symbiosis, the factors that shape it, and its  
83 potential contribution to the host insular adaptation (Baldo et al., 2018; Davison et al., 2018;  
84 Lankau et al., 2012; Michel et al., 2018).

85 The Balearic wall lizard *Podarcis lilfordi*, also known as the Lilford's wall lizard, represents a  
86 particularly suitable system for this purpose (Baldo et al., 2018). The species is endemic to the

87 Balearic Islands and currently comprises several island populations in the archipelagos of Cabrera,  
88 Mallorca and Menorca (Salvador, 2009). During the last ice age, the ancestral populations present  
89 in the mainland of Mallorca and Menorca dispersed to offshore islets following a vicariance  
90 process; after the Post-Messinian isolation that started about 2.6 million years ago (Brown et al.,  
91 2008; Terrasa et al., 2009), populations remained confined, while Mallorca and Menorca ancestral  
92 populations were driven to extinction by the introduction of predators (Alcover, 2000).

93 All sister populations from these small continental islands are bonded by their historical legacy  
94 (common ancestry and a similar genetic background) (Brown et al., 2008; Buades et al., 2013;  
95 Pérez-Cembranos et al., 2020; Terrasa et al., 2009), while representing evolutionary units (Pérez-  
96 Cembranos et al., 2020) given their discrete geographic boundaries that have limited both host and  
97 gut microbe dispersion since their divergence. In most of these islets, the community of terrestrial  
98 vertebrates is dominated by lizards (only few islets show presence of geckos, mice, rats and  
99 rabbits), reducing chances of interspecific interactions. Furthermore, their shared climate, reduced  
100 area and low biotic diversity make these populations largely controllable and comparable systems,  
101 facilitating the study of the major common factors forging and maintaining this symbiotic  
102 association (Baldo et al., 2018; Lankau et al., 2012; Michel et al., 2018). In a previous study on  
103 seven Menorcan populations we have characterised for the first time the composition of the  
104 Lilford's wall lizard gut microbiota, revealing a large conservation of the taxonomic profiles  
105 (resembling the typical vertebrate microbiota), with a potential impact of the phylogeographic  
106 history and ecological drift in shaping microbial diversity (Baldo et al., 2018). However, the  
107 sampling design and size (five individuals per population) did not allow us to explore drivers of  
108 within population microbiota diversity, particularly sex and temporal dynamics, and the putative  
109 functional role of these communities in lizard adaptation.

110 In the present study we focused on three well-studied populations of Lilford's wall lizard found in  
111 three close islets south of Mallorca: Na Moltona, Na Guardis and En Curt (Figure 1). The three  
112 islets are less than five km apart, share nearly the same Mediterranean climate and biotic  
113 environment, and differ primarily in size and biotic index (Rotger et al., 2020). In particular, the  
114 smallest islet (En Curt) hosts a reduced plant community compared to the other two islets (Rotger  
115 et al., 2021). The lizard represents the major vertebrate species on each islet, with density ranging  
116 from 350 to 2500 ind/ha (Rotger et al., 2016). Since 2010, the three populations have been under

117 a demographic study: every spring and autumn, individuals are sampled through a capture and  
118 recapture method, photo-identified by digitally recording the pattern of ventral scales (Moya et al.,  
119 2015), sexed and measured (i.e., body length and weight). This has provided important individual-  
120 level and longitudinal data for each population, showing that the three populations differ in  
121 demographic parameters and life history traits such as body growth rate, fecundity, survival, and  
122 density (Rotger et al., 2016, 2020). A recent genetic study based on microsatellites indicates that  
123 the three populations diverged about 5,000 - 8,000 years ago (with no recent relevant immigration  
124 events), and that Na Moltona and Na Guardis represent closer sister populations (Rotger et al.,  
125 2021). Diet composition of the latter islets has been recently characterized based on fecal content  
126 of several individuals, showing that these two populations share a similar trophic ecology,  
127 primarily based on arthropods (with plant integration), with sex differences and seasonal variations  
128 in response to resource availability (Santamaría et al., 2019).

129 This extensive background population and individual-level information provides a powerful  
130 setting to begin addressing patterns of the Lilford's wall lizard gut microbiota variation within and  
131 among populations, within their short temporal scale of divergence (< 10,000 years). This variation  
132 can also inform on the potential role of the gut microbiota in the adaptation of the lizards to their  
133 insular environment.

134 Here we specifically surveyed the impact of the islet phylogeographic distance (as inferred by  
135 microsatellites), host trophic niche (according to both fecal content and stable isotopes) and  
136 intrinsic factors (sex and life stage) in shaping the gut microbial communities. We also explored,  
137 for the first time in this species, the level of persistence and plasticity of these microbial  
138 communities over time, by repeated sampling over two years and two seasons. The aim was to  
139 understand the strength of this association and the degree to which these communities change in  
140 composition along seasons. Recent studies in vertebrates have shown that the microbiota can be  
141 highly plastic (Alberdi et al., 2016; Gomez et al., 2019), and changes its composition in response  
142 to the host's physiological changes for optimization of the energy metabolism (Huus & Ley, 2021;  
143 Sommer et al., 2016) effectively boosting the host ecological adaptation by increasing its  
144 phenotypic plasticity (Guo et al., 2021; Hicks et al., 2018; Smits et al., 2017). As lizard populations  
145 experience a strong limitation in resources, particularly critical during the dry autumn season  
146 (Santamaría et al., 2019), we set to investigate whether microbiota showed evidence of seasonal

147 plasticity that might hint to a functional role of the microbiota in buffering the lizard's seasonal  
148 metabolic needs.

149 To address these goals, we sampled fecal matter from a subset of individually identified lizards of  
150 each of the three populations (both males and females) for two years, during spring and autumn  
151 seasons, and characterized the fecal microbiota by amplicon 16S rRNA sequencing.

152 The following major questions were targeted: what is the relative contribution of the host  
153 phylogeographic history and trophic ecological adaptation in driving gut microbiota divergence  
154 among allopatric populations? What are the major factors that structure the microbiota within these  
155 closed populations? What is the level of persistence of microbial taxa within a population over  
156 time? Does the gut microbiota show evidence of seasonal plasticity? Finally, are the observed  
157 microbial dynamics similar across islets/populations, suggesting a deterministic pattern?

158

## 159 **Materials and Methods**

160

### 161 **Microbiota sampling and metadata collection**

162 Faeces were collected from a total of 109 individually identified specimens of *P. lilfordi* in three  
163 islets off the south shore of Mallorca Island: Na Guardis (NG) (42 samples), Na Moltona (NM)  
164 (49) and En Curt (EC) (18) (Figure 1, Appendix S1, Table S1 for sample metadata). Sampling was  
165 performed during spring (April) and autumn (October) in 2017 and 2018, for a total of four  
166 sampling dates (“Spring-17”, “Autumn-17”, “Spring-18” and “Autumn-18”, each referred simply  
167 as to “Date”). The reproduction period is extended from Spring to the end of the Summer. Animals  
168 begin to lay eggs in May and females can lay two to three clutches (Castilla & Bauwens, 2000),  
169 usually of two to four eggs (Rotger et al., 2020). All specimens were caught in georeferenced  
170 pitfall traps containing sterile fruit juices placed along paths and vegetation edges. Specimens were  
171 weighed, and body size measured as snout to vent length (SVL). Life stage (adults, subadults and  
172 juveniles) was assigned based on the SVL, according to the mean values for the smallest described  
173 subspecies (Salvador, 2009). Age of sexual maturity is reached between 1 and 1.5 years old  
174 (juveniles are <1 year old; Rotger et al. 2016, Rotger et al. 2020). Individuals were sexed by  
175 inspection of femoral pores and counting of row ventral scales (males are larger than females and

176 show pores with visible lipophilic compounds (Salvador, 2009). Individual-based data of chest  
177 images were taken for all individuals and analyzed through the APHIS program for specimen  
178 identification and confirmation of sex (Moya et al., 2015).

179 After gentle pressing of the specimen abdomen, fecal drops were collected from the cloaca directly  
180 into a sterile 2 ml tube filled with 100% ethanol. Samples were placed at  $-20^{\circ}\text{C}$  within the first  
181 24 hours from collection and kept refrigerated until processing. Sample preservation in 95-100%  
182 ethanol was shown to be effective in maintaining microbial community composition, even for  
183 storage up to one week at room temperature (Song et al., 2016).

184 Stable isotopes analysis was conducted at the Laboratorio de Isótopos Estables (LIE-EBD/CSIC,  
185 Spain) on a subset of blood samples collected from 71 specimens in spring 2016. Following a 1-  
186 2 cm tail cut, drops of blood were immediately collected in capillaries, preserved in ethanol 70%  
187 and stored at  $-20^{\circ}\text{C}$ . Samples were dried for 48 hours at  $60^{\circ}\text{C}$  and analyzed before combustion at  
188  $1020^{\circ}\text{C}$  using a continuous flow isotope-ratio mass spectrometry system. The isotopic  
189 composition is reported in the conventional delta ( $\delta$ ) per mil notation (‰), relative to Vienna Pee  
190 Dee Belemnite ( $\delta^{13}\text{C}$ ) and atmospheric  $\text{N}_2$  ( $\delta^{15}\text{N}$ ).

191 The species is currently listed as endangered according to the IUCN red list. Specimen sampling  
192 and manipulation were carried out in accordance with the ethics guidelines and recommendations  
193 of the Species Protection Service (Department of Agriculture, Environment and Territory,  
194 Government of the Balearic Islands), under annual permits given to GT.

195

#### 196 **DNA extractions and 16S rRNA Illumina sequencing**

197 Fecal samples were briefly centrifuged, ethanol removed, and the pellet used for DNA extractions  
198 with the DNAeasy Powersoil kit (Qiagen), following the manufacturer's protocol. Samples were  
199 homogenized with 0.1 mm glass beads at 5,500 rpm, 2 x 45 sec using a Precellys Evolution  
200 instrument (Bertin Technologies). DNA quality was assessed with Nanodrop and sent to the Centre  
201 for Genomic Regulation (CRG) in Barcelona (Spain) for amplicon generation and sequencing. The  
202 region V3-V4 of 16S rRNA was amplified using a pool of five forward and reverse primers  
203 (including a frameshift to increase diversity) with Nextera overhangs (Appendix S1, Table S2).  
204 For each sample, amplicons were generated in three-replicates using KAPA Hifi DNA polymerase



205 (Roche), with a first round of PCR (25 cycles); amplicons were then pooled and a 5 µl purified  
206 aliquot was used to seed the second PCR (8 cycles) for individual barcoding. Two negative controls  
207 (water only) and two mock communities (HM-277D and HM-276D from BEI Resources) were  
208 processed along with sample DNA. Barcoded amplicons were pooled at equimolar concentrations  
209 and the final library cleaned with the Sequel kit (Invitrogen). The library was sequenced on  
210 Illumina MiSeq v3 (600-cycle cartridge, 300 paired-end reads). The final sample dataset did not  
211 include any recaptured specimens.

212

### 213 **Amplicon sequence analyses**

214 Demultiplexed sequences were input into Qiime2 (Caporaso et al., 2010), primers were removed,  
215 and reads were joined with “join-pairs” and filtered with “quality-filter q-score-joined”. Sequences  
216 were denoised with DEBLUR version 1.1.0 (trim-length=400, min-reads=5) (Amir et al., 2017)  
217 to produce Amplicon Sequence Variants (ASVs). Taxonomic assignment was performed on a  
218 trained classifier using the Greengenes database version 13\_5 (McDonald et al., 2012). ASVs  
219 classified as mitochondria and chloroplasts or present in the controls (water and mock  
220 communities) were discarded (Appendix S1, Table S3). Sequences were aligned with Mafft in  
221 Qiime2, and hypervariable regions masked. Columns with gaps present in more than 50% of the  
222 sequences were removed using trimal (Capella-Gutiérrez et al., 2009). A rooted phylogenetic tree  
223 was built with FastTree (Price et al., 2009) and used for the unweighted Unifrac analysis. To limit  
224 bias in sample sequencing effort, data was rarefied to the minimum sample size (26003 sequences)  
225 and imported into the R environment using the phyloseq package (McMurdie & Holmes, 2013).

226

### 227 **Taxonomic composition and diversity**

228 Taxonomic barplots were built with *ggplot* function in the *ggplot2* R package. Alpha diversity was  
229 estimated according to Chao1 and Shannon indexes on seasonal datasets using the function  
230 *plot\_richness* in *phyloseq*. Differences by islet and season were tested with two-way analysis of  
231 variance models.

232 Beta diversity was visually explored with principal coordinates analysis (PCoA) on Bray-Curtis  
233 distances calculated from square root transformed ASV rarefied data using function *cmdscale* in



234 the R stats package. This distance was made euclidean by taking the square root before analysis.  
235 Differences in microbiota composition according to islet, sex, life stage, season, and year were  
236 assessed with permutational multivariate analysis of variance (PERMANOVA) on the same  
237 distance matrix after checking for homogeneity in multivariate dispersion. Model selection was  
238 performed by first fitting a model with all main terms and all two-way interactions, then refitting  
239 the model without the interaction terms with large p-values ( $p > 0.1$ ) in the full model based on  
240 marginal tests with 10000 permutations. Unlike sequential tests, marginal tests evaluate each term  
241 against a model containing all other terms. Therefore, the refitted model contains tests for the  
242 chosen interactions and for the main terms that do not form part of an interaction term.  
243 PERMANOVA was done with function *anova2*, and multivariate homogeneity in dispersions with  
244 function *betadisper*, both in the R package ‘vegan’ (Oksanen et al., 2020).

245

#### 246 **Microbiota and host genetic and trophic distances**

247 Microbiota distances among islets were calculated as the islet centroids computed from the Bray-  
248 Curtis and unweighted Unifrac distance matrices using the function *distance* in the phyloseq  
249 package and function *dist\_between\_centroids* in the usedist package (Bittinger, 2020). To take into  
250 account intrapopulation microbiota variance in centroid estimates, multiple distance matrices were  
251 built on distinct core datasets (50 to 90%), where the core is a subset of ASVs shared among a  
252 cutoff percentage of individuals within a population. Host genetic distances among the three  
253 islets/populations were inferred using average *Fst* distances according to published microsatellites  
254 data (Rotger et al., 2021).

255 Differences in mean values of stable isotopes among islets were tested with generalised least  
256 squares (GLS) to account for strong heteroskedasticity. Post-hoc pairwise comparisons were  
257 performed using the Satterthwaite approximation for degrees of freedom and the Tukey method  
258 for p-value adjustment. Models were fitted with function *gls* in the ‘nlme’ R package (Pinheiro  
259 and Bates, 2022), and pairwise comparisons with the ‘emmeans’ package (Lenth, 2022).

260

#### 261 **Islets microbial markers**

262 Bacteria taxa driving differences in microbiota composition across populations (i.e., islet  
263 biomarkers) were searched through a double approach: the Dufrene-Legendre Indicator Species  
264 analysis using the *indval* function in the labdvs R package (Roberts, 2019) and the Linear  
265 discriminant analysis Effect Size (LEfSe) for biomarker discovery (Segata et al., 2011). Both  
266 approaches retrieve differences across pairs of groups considering both presence-absence and  
267 differential abundances. Results obtained from the two methods were intersected to account for  
268 potential methodological biases (Nearing et al., 2022).

269 For both approaches, the input dataset was rarefied, retaining only ASVs with more than 100 total  
270 sum counts to reduce sparsity issues (Nearing et al., 2022) , and the dataset split into spring and  
271 autumn samples, performing the analysis on seasonal datasets. Juveniles were excluded from this  
272 analysis due to insufficient representation in the sample. *Indval* analyses were run on all taxonomic  
273 levels (from ASV to phylum), binning counts with the function *aggregate* in R stats package.  
274 Significant ASVs/taxa were retained when  $\text{relfreq} \geq 0.6$  (minimum relative frequency of  
275 occurrence within a population for ASV/taxa to be retained) and  $p < 0.01$ . Results from spring and  
276 autumn datasets were crossed to obtain season-independent discriminatory features. LEfSe  
277 analyses were run in the Galaxy web application setting the class to “Islet” (Kruskal-Wallis among  
278 classes  $p = 0.01$ , and pairwise Wilcoxon test between subclasses,  $p = 0.01$ ), and a threshold on the  
279 logarithmic LDA set to 3, with one-against-all strategy. The analyses were run on ASV and higher  
280 taxa levels separately. Only ASV/taxa retrieved in both seasonal datasets were retained as islet  
281 biomarkers.

282

### 283 **Persistence of ASVs over sampling dates and seasonal microbial markers**

284

285 Recurrent occurrence of the same microbial ASVs over time, here referred to as persistence, was  
286 evaluated on the two major islets NG and NM. For each islet, we subsetted the data according to  
287 “Date” (season-year) and for each subset we estimated the 50% core ASVs. The four core datasets  
288 were then compared to retrieve common ASVs, i.e., the microbial component present along the  
289 four sampling dates. Comparing the 50% core by date, instead of using the full microbial diversity  
290 per date, reduces the probability that only a few specimens per population contributed to the

291 observed pattern. Venn diagrams were produced using the online tool at  
292 [http://bioinformatics.psb.ugent.be/cgi-bin/liste/Venn/calculate\\_venn.html](http://bioinformatics.psb.ugent.be/cgi-bin/liste/Venn/calculate_venn.html).

293 To estimate bacterial features responsible for seasonal differences within a population (i.e.  
294 seasonal markers), we undertook a similar double approach, performing both LEfse and indval  
295 analyses. The analyses were run on NM and NG, which had large sample representation for both  
296 autumn and spring 2017 and 2018 (above 15 samples each season/year). Same season samples  
297 within each population were treated as a single group and discriminatory features were estimated  
298 as above (for Lefse analysis, class was set to “Season”).

299

## 300 **Results**

301 We sequenced the fecal microbiota of 109 specimens from the three closed populations/islets south  
302 of Mallorca: Na Moltona (NM), Na Guardis (NG), and En Curt (EC) (Figure 1). Fecal samples  
303 were associated to four major categorical variables: islet, sex, life stage, season (spring and  
304 autumn) and year (2017 and 2018) (see Appendix S1, Table S1 for sample metadata). The final  
305 microbiota dataset encompassed an even representation of each variable, except for life stage  
306 (nearly 80% of the specimens were adults).

307 After extensive quality filtering and removal of taxa found in the controls (Appendix S1, Table  
308 S3), we obtained a total of 6195163 sequences and 2313 ASVs (10 minimum reads) (abundance  
309 matrix with taxonomy is available at Mendeley Data, doi: 10.17632/bc5nxsxgxd.1): 1360 ASVs  
310 in EC, 1647 in NG and 1677 in NM. Of these ASVs, 91 (EC), 74 (NG) and 70 (NM) were present  
311 in at least 80% of the specimens within each islet/population (i.e., they form the core microbiota).  
312 According to rarefaction curves, sequencing effort was sufficient to approach the maximum  
313 diversity for most samples (Supporting Information, Figure S1). Data was nonetheless rarefied to  
314 the minimum sample depth of 26003 reads (corresponding to 1933 ASVs) to account for potential  
315 bias in sequencing effort and sparsity, and used for all subsequent analyses.

316

317 **Highly conserved microbial taxonomic profile among wall Lilford’s wall lizard allopatric**  
318 **populations**

319 The overall fecal microbial dataset comprises a total of 18 unique phyla, 36 classes, 64 orders, 94  
320 families, 134 genera, and 66 species. The taxonomic profile of the most abundant taxa was  
321 remarkably conserved at phylum, family, and genus level across all individuals (Supporting  
322 Information, Figure S2), with no major compositional differences across islets, between males and  
323 females and along the four sampling dates (Figure 2). In all cases, the two most abundant phyla  
324 were Firmicutes (43%) and Bacteroidetes (38%), with similar relative abundances, followed by  
325 Proteobacteria (8%) and Tenericutes (6%) (Figure 2). Dominant families were Bacteroidaceae  
326 (21%), Lachnospiraceae (15%), Ruminococcaceae (8%) and Porphyromonadaceae (8%). The  
327 most abundant genera were *Bacteroides* (21%), *Parabacteroides* (7%), *Anaeroplasma* (5%),  
328 *Oscillospira* (4%), *Odoribacter* (3.5%) and *Roseburia* (2.6%) (Figure 2). Only 8% of the ASVs  
329 (154 out of 1933) reached species classification (confidence threshold 80%); the most abundant  
330 species were *Parabacteroides gordonii* (4.4%), *Clostridium ramosum*, *Parabacteroides distasonis*  
331 and *Akkermansia muciniphila* (all <1%).

332

### 333 **Islet and season as major variables shaping the microbiota structure**

334 PERMANOVA analysis on the entire dataset (i.e., including all life stages, i.e., juveniles, subadults  
335 and adults) indicated statistically significant clustering by the interaction between islet and season  
336 ( $P \leq 0.0001$ ), and islet and life stage ( $p = 0.005$ ), marginal differences by year ( $P = 0.0449$ ), and  
337 no sex effects ( $P = 0.1197$ ) (Table 1a). This suggests potential ontogenetic differences in gut  
338 microbiota. However, juveniles were underrepresented in our dataset ( $n = 9$  out of 109 individuals).  
339 When excluding juveniles, PERMANOVA analysis shows again strongly significant islet by  
340 season interactions ( $P \leq 0.0001$ ) and marginal year effects ( $P = 0.0396$ ), yet no differences by either  
341 sex or life stage (Table 1b). This suggests that differences in life stage were mostly due to the  
342 juvenile stage, with no differences between adults and subadults. Therefore, juveniles were  
343 excluded from all subsequent analyses.

344 Principal coordinates analysis showed that EC hosted a clearly distinct microbial community,  
345 while NG and NM substantially overlapped on the subspace defined by PCo1 and PCo2 (Figure  
346 3). In addition, post-hoc tests by islet showed that season was a statistically significant factor in  
347 every case, but most clearly in Na Moltona and Na Guardis (NM:  $P = 0.0002$ , NG:  $P \leq 0.0001$ ,  
348 EC:  $P = 0.008$ ) (Figure 3).

349 According to alpha diversity analyses on seasonal datasets (Figure 4), spring showed a highly  
350 homogenous pattern of diversity, with no major differences across any islet pairwise (both Chao1  
351 and Shannon,  $p > 0.05$ ), whereas autumn marked a large difference among all three populations,  
352 with EC being the most diverse (Chao1 and Shannon,  $p < 0.05$  for all islet pairwises, except for  
353 NG-EC,  $p > 0.05$  Shannon). Within individual populations, spring showed a richer community in  
354 NG ( $p < 0.001$  for Chao1, but not significant for Shannon) but not in NM ( $p > 0.05$  both indexes),  
355 while the opposite pattern was observed in EC, with autumn being most diverse ( $p < 0.05$  both  
356 indexes). No statistically significant differences in alpha diversity were found between sexes  
357 within individual islets ( $p > 0.1$  for both indexes).

358

### 359 **Among population microbiota diversity is explained by both lizard phylogeography and** 360 **trophic niche**

361 To explore the “islet/population” effect on the microbiota diversity (Figure 3 and 4), we searched  
362 for biomarkers of each islet using a double approach (*indval* and Lefse analyses, see Methods). A  
363 total of 14 ASVs and two taxa were retrieved by the two methods, which discriminated across  
364 islets according to both autumn and spring datasets (Figure 5 and Appendix S1, Table S4 for results  
365 and taxonomic classification). In accordance with the PCoA clustering (Figure 3), most  
366 discriminatory features were enriched in the EC islet and virtually found only on this islet, with no  
367 occurrence in either NM or NG (relabund values close to 0 for both NM and NG, Table S4). Only  
368 three ASVs were found to be specifically enriched in NM, although not unique to this islet, while  
369 NG showed no islet-specific microbial markers. Most discriminatory ASVs belonged to the order  
370 Bacteroidales, and fermentative families Bacteroidaceae and Porphyromonadaceae. Their  
371 abundance across individuals was highly comparable between spring and autumn, suggesting  
372 stability in biomarkers relative abundance over time (Figure 5). At taxa level, the islet EC showed  
373 a unique enrichment in the phylum Elusimicrobia (virtually absent in the other islets) and in the  
374 genus *Vibrio*, specifically in the species *Vibrio rumoiensis* (phylum Proteobacteria) (Figure 5). No  
375 specific taxa markers were detected for either NG or NM.

376 Bray-Curtis microbiota centroid distances among islets, calculated using distinct core subsets per  
377 islet (50, 60, 70, 80%), indicated high microbial community relatedness between the two largest  
378 islets, NG and NM, with EC being the most differentiated (Figure 6A, see Figure S3 for Unifrac

379 distances). These microbiota distances were concordant with the host population genetic distances  
380 based on previously estimated  $F_{st}$  values of microsatellite diversity (Rotger et al., 2021).

381 Trophic niche distances among the three populations were investigated through stable isotopes on  
382 sample sets from 2016 (data available at Appendix S1, Table S5). Findings indicated that both  
383 carbon-13 and nitrogen-15 differed among islets (Figure 6B), while post-hoc pairwise analyses  
384 showed that in both cases EC displayed higher values of both carbon-13 and particularly of  
385 nitrogen-15 with respect to both NG (N-15:  $t[46.8] = 19.7$ ,  $P < 0.001$ ; C-13:  $t[37.1] = 7.57$ ,  $P <$   
386  $0.001$ ), and NM (N-15:  $t[35.9] = 14.38$ ,  $P < 0.001$ ; C-13:  $t[41.8] = 3.44$ ,  $p = 0.038$ ), while the  
387 latter islets differed for carbon-13 ( $t[20.1] = 4.01$ ,  $P = 0.0019$ ) but only marginally for nitrogen-15  
388 ( $t[25.8] = 2.58$ ,  $P = 0.0407$ ).

389 Overall, the microbiota distances were consistent with both the host population genetic and  
390 ecological distances.

391

### 392 **Within island/population microbiota diversity: microbiota persistence and seasonal effect**

393 Microbial diversity within islets was primarily driven by “season” ( $p = 0.001$ , no juveniles) (Table  
394 1 and Figure 3). To evaluate the level of microbiota plasticity within a population over time (i.e.,  
395 degree of changes in relative abundance and/or turnover of microbial taxa), we investigated both  
396 persistence of microbial ASVs along the four sampling “dates” (spring-17, autumn-17, spring-18  
397 and autumn-18) and enrichment patterns as a function of season (spring vs autumn). The analyses  
398 were restricted to the two islets with the largest sample representation per date, NM and NG  
399 (Figure 1).

400 Persistence was assessed as the portion of the microbial ASVs that was consistently retrieved in  
401 all four sampling dates, considering only those ASVs that occurred in at least 50% of the specimens  
402 within a single date. Of this total core ASV diversity (441 for NM and 334 for NG), 30.5% (102  
403 ASVs for NG) and 49% (151 ASVs for NM) were recurrent in all four dates (Supporting  
404 Information, Figure S4 and Appendix S1, Table S6 and S7), with 82 ASVs being common to both  
405 islets. Taxonomic profiles of these persistent ASVs were largely congruent between islets, with  
406 the majority belonging to the family Ruminococcaceae and genus *Oscillospira*, followed by

407 members of the Lachnospiraceae and Bacteroidaceae (particularly of the genus *Bacteroides*)  
408 (Figure 7).

409 According to microbiota centroids by “Date” on Bray-Curtis distances, same season microbiotas  
410 sampled in 2017 and 2018 were highly similar and diverged from microbiotas collected in distinct  
411 seasons (Figure 8A), indicating that the microbiota structure alternates across seasons in a quite  
412 conserved manner: the microbiota configuration state shifts from spring 2017 to autumn 2017,  
413 then goes back to a similar state in spring 2018 and finally shifts again to the autumn configuration  
414 in 2018. This pattern was observed in both islets and was robust to the use of different core subsets,  
415 up to 90% (Figure S5), suggesting it is largely driven by quantitative changes in relative  
416 abundances of core ASVs.

417 Enrichment analyses with *indval* and Lefse analyses identified 63 and 105 ASVs that were  
418 differentially abundant between spring and autumn in NM and NG, respectively (of these, 20  
419 ASVs (NG) and 11 ASVs (NM) were consistently retrieved by both methods, Table S8). Most of  
420 these ASV seasonal markers (spring and autumn enriched) showed a clear fluctuation in relative  
421 abundance along the four sampling dates, for both islets (Figure 8B). A proportion of them  
422 corresponded to persistent ASVs (7 of the 20 ASVs in NG, and 5 of the 11 in NM), with the  
423 majority showing an average abundance different from zero for all dates (see in particular NM  
424 autumn-enriched ASVs) (Figure 8B). Only few ASVs dropped below the threshold of detection  
425 during one/two dates (particularly in NG, Autumn-17), while being present on all other dates. The  
426 taxonomic profile of enriched ASVs was largely similar between seasons and islets: most ASVs  
427 (~70%) belonged to the order Clostridiales and family Ruminococcaceae and Lachnospiraceae  
428 (Figure 8B).

429 A similar pattern was retrieved for higher taxonomic levels, with most taxa being consistently  
430 retrieved across all dates, while fluctuating in relative abundances in both islets (Supporting  
431 Information, Figure S6). Notably, few species showed a clear seasonal-associated  
432 presence/absence pattern, including the disease-associated species *Enterobacter hormaechei* and  
433 *Lawsonia intracellularis* (autumn-specific for NG). While the taxonomic composition of enriched  
434 taxa was overall largely specific to each islet, few taxa displayed a highly congruent pattern  
435 between islets, supported by both methods (LEfse and *indval*): the genus *Odoribacter* and family



436 *Odoribacteraceae* (enriched in spring), and the genus *Anareofilum* (enriched in autumn). Both taxa  
437 form part of the core microbiota (present in at least 80% of all specimens).

438

## 439 **Discussion**

440 A fundamental question in the study of the host-microbes symbiosis is to which extent this  
441 association is resilient to spatio-temporal changes and what are the processes influencing such  
442 (lack of) divergence, which ultimately affects patterns of coevolution in animals (Mallott &  
443 Amato, 2021). The use of relatively simple natural systems (small closed populations) and  
444 individual-level data are critical to address this question.

445 Here we explored the trajectories of early diversification of the gut microbiota among and within  
446 three sister islet populations of the Balearic wall lizard, focusing on the impact of host  
447 phylogeographic history, dietary niches, host intrinsic traits (sex and lifestage) and temporal  
448 variables (year and season), with the major aim of shedding light on the strength of this symbiotic  
449 association, its level of plasticity and putative role in the host metabolic adaptation.

450

### 451 **Microbiota diversity across islet populations**

452 What drives the early steps in microbiota diversification among populations once the reproductive  
453 boundaries are set? And in which aspects do these associated communities start diverging  
454 following the host genetics and adaptation to the new environment?

455 Gut microbiota divergence across host allopatric populations is largely a function of timing since  
456 population divergence (i.e., the phylogeographic history), putative adjustments/transitions in the  
457 host ecological niche following separation, and exposure to distinct pools of environmental  
458 bacteria (Lankau et al., 2012; Michel et al., 2018). The relative impact of these processes on  
459 microbial community changes will depend on the plasticity of the gut microbiota in response to  
460 both host selectivity/filtering (underpinned by the host genetics) (Alberdi et al., 2016; Gomez et  
461 al., 2019), the level of microbial transmission across generations (both vertical and horizontal) and  
462 the impact of stochastic events (i.e., ecological drift) (Baldo et al., 2018; Lankau et al., 2012).

463 Here we observed a largely homogeneous taxonomic profile of the gut microbiota among three  
464 populations, without any major differences according to the studied variables (Figure 2 and  
465 Supporting Information, Figure S2). This is largely consistent with our previous study based on  
466 microbial content of seven populations of the same species from Menorca, using full intestine  
467 tissues (Baldo et al., 2018), with both Menorca and Mallorca populations presenting a similar  
468 dominance of the phyla Firmicutes and Bacteroidetes, families Lachnospiraceae,  
469 Ruminococcaceae and Porphyromonadaceae and genera *Bacteroides* and *Parabacteroides* (Figure  
470 2). This conservatism of the taxonomic profile likely results from common host genetic constraints  
471 (Mallott & Amato, 2021), exerting a strong imprinting and stabilising effect on the major microbial  
472 membership composition, which overcomes the exposure to distinct local environments (Baldo et  
473 al., 2018; Rotger et al., 2021), a pattern that has been previously observed in recently diverged  
474 species (e.g., in the Galapagos finch (Michel et al., 2018)).

475 Nonetheless, at finer taxonomic level, i.e., in terms of ASVs, the three islet populations carried  
476 their unique microbial signature (Figure 3). Once excluding the effect of life stage and season  
477 (therefore working only on adults/subadults and individual seasons), islet was indeed a statistically  
478 significant clustering factor, driven by a limited number of ASVs and taxa, mostly specific to the  
479 smallest islets EC (Figure 4). Islet biomarkers had comparable enrichment patterns across the  
480 spring and autumn datasets (showing independence from a seasonal effect) and might represent  
481 new uptakes, although limited, from the local microbial pool. Their functional role to the host  
482 adaptation is worth further investigation. In particular, the phylum Elusimicrobia was largely  
483 specific of EC and represents a recently identified animal-associated phylum which rely on  
484 fermentation (Méheust et al., 2020).

485 Microbiota distances among the three populations/islets were consistent with their host population  
486 genetic distances, suggesting a phylogeographic scenario of microbiota divergence following their  
487 host diversification (Figure 6A). According to published microsatellites data, NM and NG  
488 diverged about 2,000 – 4,000 years ago, with EC representing the most distant population (Rotger  
489 et al., 2021). NM and NG are the geographically and genetically closest populations and hosted  
490 the most similar microbial communities (Figure 1 and Figure 6A). A putative event of gene flow  
491 might have occurred between NM and NG in recent times (< 200 years, associated to a single  
492 specimen translocation) (Rotger et al., 2021), which could have resulted into a potential dispersion

493 of microbial taxa and a homogenization of the overall microbial diversity of these two populations.  
494 However, these two islets show clear differences in their morphological and life history traits  
495 (smaller body size and marked senescence in NG, Rotger et al. 2020), indicating an ongoing  
496 process of divergence between the two islets (Rotger et al., 2020, 2021). Their closed microbiota  
497 similarity and divergence from the the islet EC might still be compatible with a process of  
498 codivergence of microbes with the host over time, as observed in several instances across the  
499 animal kingdom (Lim & Bordenstein, 2020; Mallott & Amato, 2021). Comparisons of captive  
500 *versus* natural populations have indeed proved the ability of lizards to transmit microbes across  
501 generations (Colston, 2017; Kohl et al., 2017), suggesting a scenario of putative retention of  
502 ancestral bacteria following specimen segregation during the wall lilford's lizard vicariance  
503 process (Baldo et al., 2018).

504 Whilst microbial communities might carry a phylogeographic signal, the analysis of the trophic  
505 niche by stable isotopes provided a seemingly compatible clustering: EC deviates in its trophic  
506 niche from both NG and NM, probably due to the rocky nature of this small islet (0.30 ha) (Figure  
507 1) with a very low biotic index and limited resources, causing metabolic stress and a higher  
508 incidence of cannibalism. A wider range of both carbon-13 and nitrogen-15 values for this  
509 population (Figure 5B) indicate a larger trophic niche breadth, putatively including also marine  
510 food items obtained along the shore (molluscs and crustaceans), not predominant in either NM or  
511 NG (personal observation of behavior). Dietary adjustments can greatly impact the microbiota  
512 composition in lizards (Jiang et al., 2017; Kohl et al., 2016; Li et al., 2019; Montoya-Ciriaco et  
513 al., 2020), suggesting that the differences in trophic niche among populations can partly drive the  
514 observed microbiota clustering.

515 At present, both the phylogeographic and ecological scenarios are compatible with the observed  
516 pattern of islet microbiota divergence, inviting caution in data interpretation and especially in  
517 phyllosymbiosis claims when ecological aspects are not fully understood. A selection of putatively  
518 heritable gut bacteria is currently being analysed at strain level to resolve the evolutionary  
519 trajectories of gut microbes in the three populations. Additionally, a more in-depth study of the  
520 trophic niche should be undertaken to clarify major ecological/dietary differences across  
521 populations.

522

## 523 **Microbiota diversity within populations: lifestage effect and no sex differences**

524 Dissecting the drivers of microbial diversity within natural populations presents several challenges  
525 due to the multiple concurrent host variables to consider (e.g., sex and life stage), and the spatial-  
526 temporal effect (e.g., year and season). To date, the few available studies on lizard microbiota have  
527 indeed targeted variation between natural populations (Kohl et al., 2017; Ren et al., 2016; Zhang  
528 et al., 2018), with few of them looking at limited intrapopulation diversity aspects (Kohl et al.,  
529 2017; Ren et al., 2016).

530 The sampling design in the present study allowed us to statistically explore the relative  
531 contribution of major players in microbiota diversity within populations. This diversity was driven  
532 by temporal variables (season, but not year) and partly life stage, but not by sex (Table 1 and Figure  
533 3). Statistically significant differences between juveniles (<1 year old) and both adults and  
534 subadults suggest a change in microbiota composition during the first year of lizard development,  
535 putatively associated with niche adjustments (Pérez-Mellado et al., 2015), a preliminary finding  
536 that warrants further investigation.

537 According to previous studies in *P. lilfordi* showing sex-specific diet and niche adjustment along  
538 the year (Pérez-Mellado et al., 2015; Santamaría et al., 2019), we also expected a sex and seasonal  
539 effect on the gut microbiota. In general, lizards in Mediterranean islands are largely omnivorous  
540 and opportunistic in trophic behavior, modulating niche width and food preferences along the year  
541 in response to both resource availability and energy requirements (affected by reproductive  
542 behavior and external temperature) (Pérez-Cembranos et al., 2016). This transition in the trophic  
543 niche is particularly strong between spring (with the highest resource availability) and autumn  
544 (lowest), with hot summers marking a progressive limitation of resource availability (Pérez-  
545 Cembranos et al., 2016). According to a recent study based on individual fecal content analysis in  
546 NM and NG, the *P. lilfordi* seasonal response is sex specific (Santamaría et al., 2019), and  
547 particularly noticeable in autumn, when food resources are scarce and males show a despotic  
548 behavior (Rotger et al., 2020), restricting the female niche amplitude (Santamaría et al., 2019).  
549 Despite a sex influence on both lizard metabolism and trophic niche behavior (Pérez-Mellado et  
550 al., 2015), males and females did not carry distinct gut microbiotas in any of the three islets, nor  
551 were microbial differences observed between sexes within a season (season-by-sex interaction was  
552 not significant for individual islets). These results agree with findings in other lizard species of the

553 family Liolaemidae, where no detectable effects of sex were observed (Kohl et al., 2017). In *P.*  
554 *lilfordi*, a lack of sex effect could be associated to an omnivorous diet (with no clear sex-specific  
555 food preferences), a reduced sexual dimorphism (Rotger et al., 2020) and a large microbial  
556 metacommunity effect within the discrete boundaries of an island (Miller et al., 2018). Microbes  
557 can be largely transmissible in highly social or closed populations, due to the increased probability  
558 of contact among specimens (Raulo et al., 2021; Tung et al., 2015), allowing the rapid circulation  
559 of bacteria within the population. Furthermore, episodes of cannibalism are known within the  
560 genus *Podarcis* due to the restricted resources available in the islands (Cooper et al., 2015). Both  
561 sociality and cannibalism could provide a means of bacteria transmission between sexes, resulting  
562 in microbiota homogenization.

563

#### 564 **Temporal microbiota variation within a population/islet: persistence and seasonal plasticity**

565 Once excluding the life stage effect (i.e., restricting the analyses to subadults/adults only) and  
566 pooling males and females, within-population microbial diversity was largely driven by season.  
567 To understand the short-term temporal dynamics of the gut microbiota within a population and the  
568 strength of the host-microbes association, we explored levels of microbiota plasticity along the  
569 two years sampling.

570 An important fraction of the microbiota (at least 30% of ASVs) persisted within a population over  
571 the four sampling dates. This is likely an underestimate once considering a putative failure in ASV  
572 sequencing for some of the specimens. As our study did not compare the same set of individuals  
573 over time, such persistence should be considered as the maintenance of specific ASVs within the  
574 host population microbial metacommunity, not at individual level (Robinson et al., 2019). While  
575 we cannot exclude a contribution of the environmental allochthonous component derived from  
576 diet, we note that a 50% minimum ASV frequency occurrence among specimens within each  
577 sampling date largely excludes a stochastic microbial contribution from diet. This is in line with  
578 several studies spanning a wide range of animal taxa and consistently showing a neglectable  
579 contribution of the “external” microbiota (Costello et al., 2010; Kohl et al., 2017). Although the  
580 diet-derived microbial content of Lilford’s wall lizard has yet to be characterized, the lack of  
581 microbial sex-specific differences, whereas diet is largely sex-specific (Santamaría et al., 2019)  
582 further suggests that the impact of the allochthonous component might be minor. Future in-depth

583 characterization of the environmental microbiota, including the phyllosphere, will provide a  
584 necessary confirmation.

585 Interestingly, the taxonomic profile of these persistent ASVs was highly congruent between islets  
586 (Figure 7), with most taxa being previously identified as highly heritable in vertebrates, including  
587 the fermentative families Lachnospiraceae and Ruminococcaceae (Grieneisen et al., 2021 in wild  
588 baboons) and the genera *Oscillospira*, *Bacteroides*, *Odoribacter*, *Anaerotruncus* and  
589 *Coprobacillus* in lizards (Kohl et al., 2017). The majority represent important metabolic players  
590 (Gophna et al., 2017; Kohl et al., 2016, 2017) and are known for their ability to degrade vegetable  
591 fibres (particularly the genera *Oscillospira* and *Bacteroides*) (Gophna et al., 2017; Patnode et al.,  
592 2019). While lizards from these islands predominantly consume arthropods, particularly insects,  
593 they are known to partly feed also on plant material (including seeds, nectar and pollen) (Pérez-  
594 Cembranos et al., 2016; Santamaría et al., 2019) as a derived adaptation to the limited  
595 environmental resources (van Damme, 1999). Presence and persistence of these core fermentative  
596 bacteria would support a putative role of the gut microbiota in extending the lizard trophic niche  
597 amplitude towards the consumption of vegetable matter, an intriguing hypothesis that will need to  
598 be corroborated with a target study on metabolic contribution of gut microbes.

599 We finally looked at compositional changes that the microbiota undergoes along seasons (i.e.,  
600 seasonal plasticity). Recent studies on humans, wild great apes and mice (Baniel et al., 2021; Guo  
601 et al., 2021; Hicks et al., 2018; Maurice et al., 2015; Smits et al., 2017) have shown seasonal  
602 cycling of the gut microbiota in response to diet, suggesting that the microbiome not only can  
603 optimise energy metabolism for specific diets, but can also confer dietary flexibility to their hosts  
604 in response to physiological needs and changes in resource availability over time (Alberdi et al.,  
605 2016). To date, this seasonal effect has only been marginally explored in reptiles (Kohl et al.,  
606 2017).

607 Our findings indicated a clear seasonal shift in the gut microbiota configuration, which replicated  
608 along the two sampled years according to multiple core microbial subsets (Figure 8A and  
609 Supporting Information, Figure S5). This microbial temporal pattern was observed for both NM  
610 and NG populations, with a strong seasonal correspondence between islets, which is in line with  
611 their similar genetic background (Rotger et al., 2021) and trophic niches (Figure 6B, but also see

612 fecal content from Santamaria et al. 2019), suggesting both a potential host genotype and diet  
613 effect.

614 A large majority of the ASV and taxa seasonal markers were repeatedly observed along most  
615 sampling dates (although not in 50% of the population each date) (Figure 8B), indicating that  
616 changes were essentially quantitative (i.e., associated with variation in relative abundance,  
617 although not absolute counts, of microbial stable associates), excluding a major compositional  
618 turnover each season. ASVs seasonal makers were mainly associated to the families  
619 Ruminococcaceae and Lachnospiraceae, which have been repeatedly involved in seasonal  
620 microbial reconfiguration in mammals (Baniel et al., 2021; Maurice et al., 2015) suggesting they  
621 might represent the more plastic component of the microbiota in response to temporal  
622 dietary/physiological shifts. Among taxa, both islets showed a clear spring enrichment of the  
623 family Odoribacteriaceae and the associated genus *Odoribacter* (order Bacteroidales), a strictly  
624 anaerobic and butyrate-producing bacterium. This genus is a stable and abundant associate of  
625 lizards (Kohl et al., 2017; Zhang et al., 2018) and more general of vertebrates (Dutton et al., 2021)  
626 and it has been identified as critical metabolic players in the human gut (Hiippala et al., 2020),  
627 whereas its functional role in the Lilford's wall lizard gut remains to be investigated.

628 Overall, these seasonal microbial markers might represent important players for the gut  
629 microbiome plasticity. Whether this plasticity confers metabolic flexibility to their host, as recently  
630 observed for mammals (Guo et al., 2021; Hicks et al., 2018; Maurice et al., 2015), remains to be  
631 investigated. Unlike mammals, reptiles are ectothermic and their metabolic flexibility and putative  
632 physiological and energetic dependence on gut microbes might be under different regulatory  
633 processes (Moeller et al., 2020), an intriguing avenue that is definitely worth future research.

634

635

## 636 **Conclusions**

637 This study provides a first in-depth exploration of the trends governing gut microbial dynamics  
638 between and within populations of *P. lilfordi*. By taking advantage of individual-based microbiota  
639 data and performing comparative analyses of three sister populations found in near islets, we  
640 showed that microbial diversity among populations is primarily driven by small qualitative



641 changes, that is by the presence of few islet-specific bacterial ASVs, with neglectable variation  
642 in taxa membership. This suggests that the host genotype largely overrides the effect of geographic  
643 barriers and local exposure to different environmental pools in terms of major microbial profiles,  
644 while the environment progressively drives the diversification of symbiotic communities at strain  
645 level along that of their host populations. It remains unclear to what extent these small differences  
646 in community composition are adaptive, for instance in response to population adjustment to the  
647 trophic niche, or shaped by ecological drift, including a putative differential retention of ancestral  
648 taxa from the common ancestral population. A crucial aspect that still needs to be investigated is  
649 to which extent these gut bacteria are transmitted among *Podarcis* individuals and through the host  
650 generations.

651 On the other hand, microbiota diversity within populations is marked by seasonality, resulting in  
652 microbial cyclic fluctuations, consistently along the two sampled years and for both populations  
653 studied and suggesting a deterministic pattern in microbiome temporal changes over external  
654 stimuli (diet/season). These data clearly need to be corroborated by resampling of the same  
655 individuals across seasons. Collection of cloacal swabs instead of feces could help in sample size  
656 optimization (currently limited by lizard rare defecation) providing a means for longitudinal  
657 studies of gut microbiota in lizard natural populations.

658 Overall, the observed lack of an important turnover (i.e., no significant replacement of major taxa)  
659 in the main microbial community composition across allopatric populations of *P. lilfordi* supports  
660 a strong resilience of these gut microbial communities along the short-term evolutionary times of  
661 their host diversification, implying strength and specificity of this symbiosis. Furthermore,  
662 replicated quantitative changes in microbial reconfiguration along seasons indicated that the  
663 microbiota is, to some extent, a plastic trait that can potentially adjust to the host  
664 temporal/metabolic changes in a rather predictive manner. The challenge is now to understand the  
665 impact of microbial community signature and its plasticity on the *P. lilfordi* fitness and ecological  
666 adaptation to these small islets, as well as to evaluate the great potential of integrative holobiont  
667 studies in monitoring this endangered wild species.

668

669 **Acknowledgements**

670 We thank I. Hendriks for aid in sample collection. This study was supported by the Agencia Estatal  
671 de Investigación (AEI) and the Fondo Europeo de Desarrollo Regional (FEDER) (CGL2017-  
672 82986-C2-2-P) to L.B. and by the project PRD2018/25 (CAIB - Government of the Balearic  
673 Islands) to G.T.

#### 674 **Conflict of Interest**

675 The Authors declare that they have no conflict of interest.

#### 676 **Authors' contributions**

677 L.B. conceived the ideas, L.B., G.T., J.M.I. and A.R.V. performed the sampling and collected  
678 metadata; L.B. and J.L.R. designed methodology and analysed the data; L.B. led the writing of the  
679 manuscript. All authors contributed critically to the drafts and gave final approval for publication.

#### 680 **Data Availability Statement**

681 Raw 16S rRNA Miseq Data is available at the Bioproject PRJNA764850. Original ASV  
682 abundance matrix per sample and corresponding taxonomic classification is available on Mendeley  
683 Data (doi: 10.17632/bc5nxsxgxd.1).

#### 684 **Tables and Figure legends**

685 **Table 1:** Results of PERMANOVA (9999 permutations). All tests are marginal.

686 **Figure 1:** Location of the three islets under study and sample statistics. The table lists the number  
687 of fecal samples per sex (females and males, without including one unsexed juvenile per islet),  
688 season (spring and autumn) and year (2017 and 2018). See Appendix S1, Table S1, for sample  
689 metadata.

690 **Figure 2:** Taxonomic composition of the *P. lilfordi* gut microbiota at phylum, family, and genus  
691 levels according to “islet”, “sex” and sampling “date” (season-year). Juveniles (n = 9) were  
692 excluded. The legends list only the top 10 taxa (all remaining taxa were included in “Others”). No  
693 major taxonomic differences were observed as a function of any of the variables. For individual  
694 specimen taxonomic profile see Supporting Information, Figure S2.

695 **Figure 3:** PCoA based on Bray-Curtis distances of the *P. lilfordi* gut microbiota depicting diversity  
696 among populations (“islets”) and within populations, according to “season” and “sex”. Dots  
697 represent specimens. Juveniles (n = 9) were excluded. Ellipses (calculated with stat\_ellipse in

698 ggplot2) enclose 95% of the expected values around centroids assuming a *t* distribution. Data were  
699 square root transformed. Microbiota differences were driven by “islet”, “season” (within each  
700 islet), but not “sex”.

701 **Figure 4:** Gut microbiota alpha diversity by islet according to Chao1 and Shannon, estimated on  
702 seasonal datasets. Differences among islets are observed only for the autumn dataset.

703 **Figure 5:** Heatmap of the microbial markers (14 ASVs and two taxa) driving differences across  
704 islets, consistently in spring and autumn. Pattern of ASV relative abundance per specimen (x axis,  
705 ordered by their mean abundances in spring) is highly concordant between seasons, despite the  
706 datasets include different sets of individuals. Heatmaps were built on log-transformed data grouped  
707 by islet and season. Data were restricted to ASVs and taxa retrieved by both indval and LEfSe  
708 approaches (for indavl,  $\text{relfreq} \geq 0.6$  and  $p < 0.01$ ; for LEfSe  $\text{LDA} > 3$  and  $p < 0.01$ ). See Appendix  
709 S1, Table S4 for full taxonomic classification and statistics.

710 **Figure 6:** Host genetic and gut microbiota distances among the three islets/populations (A) and  
711 host trophic niches (B). A) Superimposed map of microbiota centroids distances (Bray-Curtis) per  
712 islet calculated on different core subsets, and host population genetics distance based on *Fst* values  
713 estimated on available microsatellites from a previous study (pairwise *Fst*, EC-NM: 0.135, EC-  
714 NG: 0.144 , NM-NG: 0.03,  $p=0.001$  for all pairwises) (Rotger et al., 2021). See Supporting  
715 Information, Figure S3 for results based on Unifrac distances). B) Stable isotopes estimated for  
716 each population based on a dataset from spring 2016 (Appendix S1, Table S5). EC displayed  
717 higher values of both carbon-13 and particularly of nitrogen-15, with minor differences among  
718 NM and NG. The relative distances among islets according to host genetics, trophic ecology and  
719 gut microbiota are highly congruent.

720 **Figure 7:** Family and genus-level taxonomic profile of persistent ASVs retrieved along the four  
721 sampling dates. The bars indicate the frequency of ASV per each taxon. The two islets shared a  
722 highly similar taxonomic profile.

723 **Figure 8:** Microbiota seasonal changes (spring and autumn) in NG and NM along two years  
724 sampling (2017-18). A) PCoA based on Bray-Curtis distances on square root transformed values.  
725 Square boxes depict centroids for each year and season, with lines connecting centroids with  
726 individual observations. Microbiota configuration changes across seasons in a repetitive manner

727 and consistently in the two populations. Results were robust to the use of different core subsets  
728 (see Supporting Information, Figure S5). B) Variation in mean relative abundance along “dates”  
729 of ASVs that were significantly enriched in either spring or autumn according to LEfSe and/or  
730 indval analyses. A clear pattern of seasonal fluctuations can be observed for most ASVs, with the  
731 majority belonging to the families Ruminococcaceae and Lachnospiraceae. A total of 20 ASVs  
732 (NG) and 11 ASVs (NM) were consistently retrieved by both methods (see also Appendix S1,  
733 Table S8).

734

### 735 **Supporting Information**

736 **Figure S1:** Rarefaction curves (step = 1000 counts) summarising sequencing effort per  
737 sample/specimen. The dashed line shows the sample with minimum sequence coverage (260003  
738 sequence counts).

739 **Figure S2:** Microbiota taxonomic composition (phylum and family) at specimen level. Legends  
740 list only the top ten most abundant taxa. The remaining were included in “Others”.

741 **Figure S3:** Microbiota centroid distances according to unweighted Unifrac, estimated on different  
742 core subsets, and host genetic distances according to *Fst* values estimated from published  
743 microsatellites data (Rotger et al. 2021).

744 **Figure S4:** Venn diagrams showing shared ASVs across the four sampling dates (i.e. persistent  
745 ASVs). For each date, we considered only ASVs found in at least 50% of the specimens.

746 **Figure S5:** PCoA of microbiota Bray-Curtis distances according to Date, estimated on different  
747 core subsets (50, 70, 80 and 90%). The rectangular box represents the centroid per date.

748 **Figure S6:** Variation in relative abundance along “dates” of taxa that were significantly enriched  
749 in either spring or autumn according to LEfSe and/or indval analyses. Fluctuations in relative  
750 abundance between dates for all taxonomic levels (Species to Phylum) were calculated as mean  
751 relative abundances on reads aggregated by levels (i.e., after adding all all reads corresponding to  
752 a particular taxon).

753

### 754 **Appendix S1**

755 **Table S1:** Sample metadata.

756 **Table S2:** Primers used for amplification of the region V3-V4 of 16S rRNA.

757 **Table S3:** Abundance matrix of sequence counts found in the controls (PCR negative controls and  
758 mock communities) and corresponding taxonomic classification.

759 **Table S4:** List of ASVs that significantly discriminated among islets based on both seasonal  
760 datasets and according to both “indval” (in the *labdsv* R package) and LEfSe analyses.

761 **Table S5:** Stable isotopes estimated on 71 specimens collected during spring 2016.

762 **Table S6:** List of persistent ASVs found in NG.

763 **Table S7:** List of persistent ASVs found in NM.

764 **Table S8:** List of ASVs that significantly discriminated between seasons within single islets (NG  
765 and NM) according to both indval and LEfSe analyses.

766

## 767 **References**

768 Alberdi, A., Aizpurua, O., Bohmann, K., Zepeda-Mendoza, M. L., & Gilbert, M. T. P. (2016).

769 Do Vertebrate Gut Metagenomes Confer Rapid Ecological Adaptation? In *Trends in*  
770 *Ecology and Evolution* (Vol. 31, Issue 9, pp. 689–699). Elsevier Ltd.

771 <https://doi.org/10.1016/j.tree.2016.06.008>

772 Alberdi, A., Andersen, S. B., Limborg, M. T., Dunn, R. R., & Gilbert, M. T. P. (2021).

773 Disentangling host–microbiota complexity through hologenomics. *Nature Reviews*  
774 *Genetics*. <https://doi.org/10.1038/s41576-021-00421-0>

775 Alcover, J. A. (2000). Vertebrate Evolution and Extinction on Western and Central  
776 Mediterranean Islands. *TROPICS*, *10*(1), 103–123.

777 Amir, A., McDonald, D., Navas-Molina, J. A., Kopylova, E., Morton, J. T., Zech Xu, Z.,  
778 Kightley, E. P., Thompson, L. R., Hyde, E. R., Gonzalez, A., & Knight, R. (2017). Deblur  
779 Rapidly Resolves Single-Nucleotide Community Sequence Patterns. *MSystems*, *2*(2).

780 <https://doi.org/10.1128/msystems.00191-16>

781 Baldo, L., Riera, J. L., Mitsi, K., & Pretus, J. L. (2018). Processes shaping gut microbiota  
782 diversity in allopatric populations of the endemic lizard *Podarcis lilfordi* from Menorcan  
783 islets (Balearic Islands). *FEMS Microbiology Ecology*, *94*(2), 1–14.

784 <https://doi.org/10.1093/femsec/fix186>

785 Baniel, A., Amato, K. R., Beehner, J. C., Bergman, T. J., Mercer, A., Perlman, R. F., Petrullo, L.,  
786 Reitsema, L., Sams, S., Lu, A., & Snyder-Mackler, N. (2021). Seasonal shifts in the gut  
787 microbiome indicate plastic responses to diet in wild geladas. *Microbiome*, *9*(1).

788 <https://doi.org/10.1186/S40168-020-00977-9>

- 789 Bittinger, K. (2020). *usedist: Distance Matrix Utilities. R package version 0.4.0.*  
790 <https://CRAN.R-Project.Org/Package=usedist>.
- 791 Bittkau, C., & Comes, H. P. (2005). Evolutionary processes in a continental island system:  
792 Molecular phylogeography of the Aegean *Nigella arvensis* alliance (Ranunculaceae)  
793 inferred from chloroplast DNA. *Molecular Ecology*, *14*(13), 4065–4083.  
794 <https://doi.org/10.1111/j.1365-294X.2005.02725.x>
- 795 Brown, R. P., Terrasa, B., Pérez-Mellado, V., Castro, J. A., Hoskisson, P. A., Picornell, A., &  
796 Ramon, M. M. (2008). Bayesian estimation of post-Messinian divergence times in Balearic  
797 Island lizards. *Molecular Phylogenetics and Evolution*, *48*(1), 350–358.  
798 <https://doi.org/10.1016/j.ympev.2008.04.013>
- 799 Buades, J. M., Rodríguez, V., Terrasa, B., Pérez-Mellado, V., Brown, R. P., Castro, J. A.,  
800 Picornell, A., & Ramon, M. M. (2013). Variability of the *mc1r* Gene in Melanic and Non-  
801 Melanic *Podarcis lilfordi* and *Podarcis pityusensis* from the Balearic Archipelago. *PLoS*  
802 *ONE*, *8*(1). <https://doi.org/10.1371/journal.pone.0053088>
- 803 Capella-Gutiérrez, S., Silla-Martínez, J. M., & Gabaldón, T. (2009). trimAl: A tool for  
804 automated alignment trimming in large-scale phylogenetic analyses. *Bioinformatics*, *25*(15),  
805 1972–1973. <https://doi.org/10.1093/bioinformatics/btp348>
- 806 Caporaso, J. G., Kuczynski, J., Stombaugh, J., Bittinger, K., Bushman, F. D., Costello, E. K.,  
807 Fierer, N., Pêa, A. G., Goodrich, J. K., Gordon, J. I., Huttley, G. A., Kelley, S. T., Knights,  
808 D., Koenig, J. E., Ley, R. E., Lozupone, C. A., McDonald, D., Muegge, B. D., Pirrung, M.,  
809 ... Knight, R. (2010). QIIME allows analysis of high-throughput community sequencing  
810 data. In *Nature Methods* (Vol. 7, Issue 5, pp. 335–336). <https://doi.org/10.1038/nmeth.f.303>
- 811 Castilla, A., & Bauwens, D. (2000). Reproductive Characteristics of the Island Lacertid Lizard  
812 *Podarcis lilfordi*. *Journal of Herpetology*, *34*(3), 390–396.
- 813 Colston, T. J. (2017). Gut microbiome transmission in lizards. In *Molecular ecology* (Vol. 26,  
814 Issue 4, pp. 972–974). NLM (Medline). <https://doi.org/10.1111/mec.13987>
- 815 Cooper, W. E., Dimopoulos, I., & Pafilis, P. (2015). Sex, age, and population density affect  
816 aggressive behaviors in Island lizards promoting cannibalism. *Ethology*, *121*(3), 260–269.  
817 <https://doi.org/10.1111/eth.12335>
- 818 Costello, E. K., Gordon, J. I., Secor, S. M., & Knight, R. (2010). Postprandial remodeling of the  
819 gut microbiota in Burmese pythons. *ISME Journal*, *4*(11), 1375–1385.  
820 <https://doi.org/10.1038/ismej.2010.71>
- 821 Davison, J., Moora, M., Öpik, M., Ainsaar, L., Ducouso, M., Hiiesalu, I., Jairus, T., Johnson,  
822 N., Jourand, P., Kalamees, R., Koorem, K., Meyer, J. Y., Püssa, K., Reier, Ü., Pärtel, M.,  
823 Semchenko, M., Traveset, A., Vasar, M., & Zobel, M. (2018). Microbial island  
824 biogeography: isolation shapes the life history characteristics but not diversity of root-  
825 symbiotic fungal communities. *ISME Journal*, *12*(9), 2211–2224.  
826 <https://doi.org/10.1038/s41396-018-0196-8>
- 827 Dutton, C. L., Subalusky, A. L., Sanchez, A., Estrela, S., Lu, N., Hamilton, S. K., Njoroge, L.,  
828 Rosi, E. J., & Post, D. M. (2021). The meta-gut: community coalescence of animal gut and  
829 environmental microbiomes. *Scientific Reports* /, *11*(23117).  
830 <https://doi.org/10.1038/s41598-021-02349-1>
- 831 Gomez, A., Sharma, A. K., Mallott, E. K., Petrzalkova, K. J., Robinson, C. A. J., Yeoman, C. J.,  
832 Carbonero, F., Pafco, B., Rothman, J. M., Ulanov, A., Vlckova, K., Amato, K. R., Schnorr,  
833 S. L., Dominy, N. J., Modry, D., Todd, A., Torralba, M., Nelson, K. E., Burns, M. B., ...



- 834 Leigh, S. R. (2019). *Plasticity in the Human Gut Microbiome Defies Evolutionary*  
835 *Constraints*. 4, 271–290. <https://doi.org/10.1128/mSphere>
- 836 Gophna, U., Konikoff, T., & Nielsen, H. B. (2017). Oscillospira and related bacteria – From  
837 metagenomic species to metabolic features. *Environmental Microbiology*, 19(3), 835–841.  
838 <https://doi.org/10.1111/1462-2920.13658>
- 839 Grieneisen, L., Dasari, M., Gould, T. J., Björk, J. R., Grenier, J. C., Yotova, V., Jansen, D.,  
840 Gottel, N., Gordon, J. B., Learn, N. H., Gesquiere, L. R., Wango, T. L., Mututua, R. S.,  
841 Warutere, J. K., Siodi, L., Gilbert, J. A., Barreiro, L. B., Alberts, S. C., Tung, J., ...  
842 Blekhan, R. (2021). Gut microbiome heritability is nearly universal but environmentally  
843 contingent. *Science*, 373(6551), 181–186. <https://doi.org/10.1126/science.aba5483>
- 844 Guo, N., Wu, Q., Shi, F., Niu, J., Zhang, T., Degen, A. A., Fang, Q., Ding, L., Shang, Z., Zhang,  
845 Z., & Long, R. (2021). Seasonal dynamics of diet–gut microbiota interaction in adaptation  
846 of yaks to life at high altitude. *Npj Biofilms and Microbiomes*, 7(1).  
847 <https://doi.org/10.1038/s41522-021-00207-6>
- 848 Henry, L. P., Bruijning, M., Forsberg, S. K. G., & Ayroles, J. F. (2021). The microbiome extends  
849 host evolutionary potential. In *Nature Communications* (Vol. 12, Issue 1). Nature Research.  
850 <https://doi.org/10.1038/s41467-021-25315-x>
- 851 Hicks, A. L., Jo Lee, K., Couto-Rodriguez, M., Patel, J., Sinha, R., Guo, C., Olson, S. H.,  
852 Seimon, A., Seimon, T. A., Ondzie, A. U., Karesh, W. B., Reed, P., Cameron, K. N., Lipki,  
853 W. I., & Brent, L. W. (2018). Gut microbiomes of wild great apes fluctuate seasonally in  
854 response to diet. *Nature Communications*, 9(1786).
- 855 Hiippala, K., Barreto, G., Burrello, C., Diaz-Basabe, A., Suutarinen, M., Kainulainen, V.,  
856 Bowers, J. R., Lemmer, D., Engelthaler, D. M., Eklund, K. K., Facciotti, F., & Satokari, R.  
857 (2020). Novel *Odoribacter splanchnicus* Strain and Its Outer Membrane Vesicles Exert  
858 Immunoregulatory Effects in vitro. *Frontiers in Microbiology*, 11.  
859 <https://doi.org/10.3389/fmicb.2020.575455>
- 860 Huus, K. E., & Ley, R. E. (2021). Blowing Hot and Cold: Body Temperature and the  
861 Microbiome. *MSystems*.
- 862 Jiang, H. Y., Ma, J. E., Li, J., Zhang, X. J., Li, L. M., He, N., Liu, H. Y., Luo, S. Y., Wu, Z. J.,  
863 Han, R. C., & Chen, J. P. (2017). Diets alter the gut microbiome of crocodile lizards.  
864 *Frontiers in Microbiology*, 8(OCT). <https://doi.org/10.3389/FMICB.2017.02073>
- 865 Kohl, K. D., Brun, A., Magallanes, M., Brinkerhoff, J., Laspiur, A., Acosta, J. C., Bordenstein,  
866 S. R., & Caviedes-Vidal, E. (2016). Physiological and microbial adjustments to diet quality  
867 permit facultative herbivory in an omnivorous lizard. *Journal of Experimental Biology*,  
868 219(12), 1903–1912. <https://doi.org/10.1242/jeb.138370>
- 869 Kohl, K. D., Brun, A., Magallanes, M., Brinkerhoff, J., Laspiur, A., Acosta, J. C., Caviedes-  
870 Vidal, E., & Bordenstein, S. R. (2017). Gut microbial ecology of lizards: insights into  
871 diversity in the wild, effects of captivity, variation across gut regions and transmission.  
872 *Molecular Ecology*, 26(4), 1175–1189. <https://doi.org/10.1111/mec.13921>
- 873 Kohl, K. D., Weiss, R. B., Cox, J., Dale, C., & Dearing, M. D. (2014). Gut microbes of  
874 mammalian herbivores facilitate intake of plant toxins. *Ecology Letters*, 17(10), 1238–1246.  
875 <https://doi.org/10.1111/ele.12329>
- 876 Lankau, E. W., Hong, P. Y., & MacKie, R. I. (2012). Ecological drift and local exposures drive  
877 enteric bacterial community differences within species of Galápagos iguanas. *Molecular*  
878 *Ecology*, 21(7), 1779–1788. <https://doi.org/10.1111/j.1365-294X.2012.05502.x>



- 879 Leitão-Gonçalves, R., Carvalho-Santos, Z., Patrícia Francisco, A., Tondolo Fioreze, G., Anjos,  
880 M., lia Baltazar, C., Paula Elias, A., Itskov, P. M., W Piper, M. D., & Ribeiro, C. (2017).  
881 *Commensal bacteria and essential amino acids control food choice behavior and*  
882 *reproduction*. <https://doi.org/10.1371/journal.pbio.2000862>
- 883 Lenth, R. (2022). *emmeans: Estimated Marginal Means, aka Least-Squares Means*. R Package  
884 Version 1.7.2. <https://CRAN.R-Project.Org/Package=emmeans>.
- 885 Levin, D., Raab, N., Pinto, Y., Rothschild, D., Zanir, G., Godneva, A., Mellul, N., Futorian, D.,  
886 Gal, D., Leviatan, S., Zeevi, D., Bachelet, I., & Segal, E. (2021). Diversity and functional  
887 landscapes in the microbiota of animals in the wild. *Science*, 372(6539).  
888 <https://doi.org/10.1126/SCIENCE.ABB5352>
- 889 Li, G., Li, J., Kohl, K. D., Yin, B., Wei, W., Wan, X., Zhu, B., & Zhang, Z. (2019). Dietary  
890 shifts influenced by livestock grazing shape the gut microbiota composition and co-  
891 occurrence networks in a local rodent species. *Journal of Animal Ecology*, 88(2), 302–314.  
892 <https://doi.org/10.1111/1365-2656.12920>
- 893 Lim, S. J., & Bordenstein, S. R. (2020). An introduction to phylosymbiosis. In *Proceedings of*  
894 *the Royal Society B: Biological Sciences* (Vol. 287, Issue 1922). Royal Society Publishing.  
895 <https://doi.org/10.1098/rspb.2019.2900>
- 896 Lindsay, E. C., Metcalfe, N. B., & Llewellyn, M. S. (2020). The potential role of the gut  
897 microbiota in shaping host energetics and metabolic rate. In *Journal of Animal Ecology*  
898 (Vol. 89, Issue 11, pp. 2415–2426). Blackwell Publishing Ltd. [https://doi.org/10.1111/1365-](https://doi.org/10.1111/1365-2656.13327)  
899 [2656.13327](https://doi.org/10.1111/1365-2656.13327)
- 900 MacArthur, R. H., & Wilson, E. O. (1967). *The theory of island biogeography / Robert H.*  
901 *MacArthur and Edward O. Wilson*. Princeton University Press Princeton, N.J .
- 902 Mallott, E. K., & Amato, K. R. (2021). Host specificity of the gut microbiome. In *Nature*  
903 *Reviews Microbiology* (Vol. 19, Issue 10, pp. 639–653). Nature Research.  
904 <https://doi.org/10.1038/s41579-021-00562-3>
- 905 Maurice, C. F., Knowles, S. C., Ladau, J., Pollard, K. S., Fenton, A., Pedersen, A. B., &  
906 Turnbaugh, P. J. (2015). Marked seasonal variation in the wild mouse gut microbiota. *The*  
907 *ISME Journal*, 9, 2423–2434. <https://doi.org/10.1038/ismej.2015.53>
- 908 McDonald, D., Price, M. N., Goodrich, J., Nawrocki, E. P., Desantis, T. Z., Probst, A., Andersen,  
909 G. L., Knight, R., & Hugenholtz, P. (2012). An improved Greengenes taxonomy with  
910 explicit ranks for ecological and evolutionary analyses of bacteria and archaea. *ISME*  
911 *Journal*, 6(3), 610–618. <https://doi.org/10.1038/ismej.2011.139>
- 912 McMurdie, P. J., & Holmes, S. (2013). phyloseq: An R Package for Reproducible Interactive  
913 Analysis and Graphics of Microbiome Census Data. *PLOS ONE*, 8(4), e61217-  
914 <https://doi.org/10.1371/journal.pone.0061217>
- 915 Méheust, R., Castelle, C. J., Matheus Carnevali, P. B., Farag, I. F., He, C., Chen, L.-X., Amano,  
916 Y., Hug, L. A., & Banfield, J. F. (2020). Groundwater Elusimicrobia are metabolically  
917 diverse compared to gut microbiome Elusimicrobia and some have a novel nitrogenase  
918 paralog. *The ISME Journal*, 14, 2907–2922. <https://doi.org/10.1038/s41396-020-0716-1>
- 919 Michel, A. J., Ward, L. M., Goffredi, S. K., Dawson, K. S., Baldassarre, D. T., Brenner, A.,  
920 Gotanda, K. M., McCormack, J. E., Mullin, S. W., O'Neill, A., Tender, G. S., Uy, J. A. C.,  
921 Yu, K., Orphan, V. J., & Chaves, J. A. (2018). The gut of the finch: Uniqueness of the gut  
922 microbiome of the Galápagos vampire finch 06 Biological Sciences 0602 Ecology 05  
923 Environmental Sciences 0502 Environmental Science and Management. *Microbiome*, 6(1).  
924 <https://doi.org/10.1186/s40168-018-0555-8>

- 925 Miller, E. T., Svanbäck, R., & Bohannan, B. J. M. (2018). Microbiomes as Metacommunities:  
926 Understanding Host-Associated Microbes through Metacommunity Ecology. In *Trends in*  
927 *Ecology and Evolution*. <https://doi.org/10.1016/j.tree.2018.09.002>
- 928 Moeller, A. H., Ivey, K., Cornwall, M. B., Herr, K., Rede, J., Taylor, E. N., & Gunderson, A. R.  
929 (2020). The lizard gut microbiome changes with temperature and is associated with heat  
930 tolerance. *Applied and Environmental Microbiology*, 86(17).  
931 <https://doi.org/10.1128/AEM.01181-20>
- 932 Montoya-Ciriaco, N., Gómez-Acata, S., Muñoz-Arenas, L. C., Dendooven, L., Estrada-Torres,  
933 A., Díaz De La Vega-Pérez, A. H., & Navarro-Noya, Y. E. (2020). Dietary effects on gut  
934 microbiota of the mesquite lizard *Sceloporus grammicus* (Wiegmann, 1828) across different  
935 altitudes. *Microbiome*, 8(1). <https://doi.org/10.1186/s40168-020-0783-6>
- 936 Moya, Ó., Pep-Luis, M., Sergio, M., José-Manuel, I., Andreu, R., Antonio, R., & Giacomo, T.  
937 (2015). APHIS: A new software for photo-matching in ecological studies. *Ecological*  
938 *Informatics*, 27, 64–70. <https://doi.org/10.1016/j.ecoinf.2015.03.003>
- 939 Nearing, J. T., Douglas, G. M., Hayes, M. G., Macdonald, J., Desai, D. K., Allward, N., Jones,  
940 C. M. A., Wright, R. J., Dhanani, A. S., Comeau, A. M., & Langille, M. G. I. (2022).  
941 Microbiome differential abundance methods produce different results across 38 datasets.  
942 *Nature Communications*, 13, 342. <https://doi.org/10.1038/s41467-022-28034-z>
- 943 Oksanen, J., Blanchet, F. G., Friendly, M., Kindt, R., Legendre, P., Mcglinn, D., Minchin, P. R.,  
944 O'hara, R. B., Simpson, G. L., Solymos, P., Henry, M., Stevens, H., Szoecs, E., &  
945 Maintainer, H. W. (2020). *Package "vegan" Title Community Ecology Package Version*  
946 *2.5-7*.
- 947 Patnode, M. L., Beller, Z. W., Han, N. D., Cheng, J., Peters, S. L., Terrapon, N., Henrissat, B., le  
948 Gall, S., Saulnier, L., Hayashi, D. K., Meynier, A., Vinoy, S., Giannone, R. J., Hettich, R.  
949 L., & Gordon, J. I. (2019). Interspecies Competition Impacts Targeted Manipulation of  
950 Human Gut Bacteria by Fiber-Derived Glycans. *Cell*, 179(1), 59-73.e13.  
951 <https://doi.org/10.1016/j.cell.2019.08.011>
- 952 Pérez-Cembranos, A., León, A., & Pérez-Mellado, V. (2016). *Omnivory of an Insular Lizard:*  
953 *Sources of Variation in the Diet of Podarcis lilfordi (Squamata, Lacertidae)*.  
954 <https://doi.org/10.1371/journal.pone.0148947>
- 955 Pérez-Cembranos, A., Pérez-Mellado, V., Alemany, I., Bassitta, M., Terrasa, B., Picornell, A.,  
956 Castro, J. A., Brown, R. P., & Ramon, C. (2020). Morphological and genetic diversity of the  
957 Balearic lizard, *Podarcis lilfordi* (Günther, 1874): Is it relevant to its conservation? *Diversity*  
958 *and Distributions*, 26(9), 1122–1141. <https://doi.org/10.1111/ddi.13107>
- 959 Pérez-Mellado, V., García-Díez, T., Hernández-Estévez, J. A., & Tavecchia, & G. (2015).  
960 *Behavioural processes, ephemeral resources and spring population dynamics of an insular*  
961 *lizard, Podarcis lilfordi (Squamata: Lacertidae)*.  
962 <https://doi.org/10.1080/11250003.2015.1093035>
- 963 Price, M. N., Dehal, P. S., & Arkin, A. P. (2009). Fasttree: Computing large minimum evolution  
964 trees with profiles instead of a distance matrix. *Molecular Biology and Evolution*, 26(7),  
965 1641–1650. <https://doi.org/10.1093/molbev/msp077>
- 966 Raulo, A., Allen, B. E., Troitsky, T., Husby, A., Firth, J. A., Coulson, T., & Knowles, S. C. L.  
967 (2021). Social networks strongly predict the gut microbiota of wild mice. *ISME Journal*.  
968 <https://doi.org/10.1038/s41396-021-00949-3>

- 969 Ren, T., Kahrl, A. F., Wu, M., & Cox, R. M. (2016). Does adaptive radiation of a host lineage  
970 promote ecological diversity of its bacterial communities? A test using gut microbiota of  
971 Anolis lizards. *Molecular Ecology*, 25(19), 4793–4804. <https://doi.org/10.1111/mec.13796>
- 972 Roberts, D. W. (2019). *Ordination and multivariate analysis for ecology*. R Package Version  
973 1.5-0. [Http://CRAN.R-Project.Org/Package=labdsv](http://CRAN.R-Project.Org/Package=labdsv).
- 974 Robinson, C. D., Bohannan, B. J. M., & Britton, R. A. (2019). Scales of persistence:  
975 transmission and the microbiome Graphical Abstract HHS Public Access. *Curr Opin*  
976 *Microbiol*, 50, 42–49. <https://doi.org/10.1016/j.mib.2019.09.009>
- 977 Rojas, C. A., Ramírez-Barahona, S., Holekamp, K. E., & Theis, K. R. (2021). Host phylogeny  
978 and host ecology structure the mammalian gut microbiota at different taxonomic scales.  
979 *Animal Microbiome*, 3(1). <https://doi.org/10.1186/s42523-021-00094-4>
- 980 Rotger, A., Igual, J. M., Genovart, M., Rodríguez, V., Ramon, C., Pérez-Mellado, V., Bibiloni,  
981 G., Rita, J., & Tavecchia, G. (2021). Contrasting Adult Body-Size in Sister Populations of  
982 the Balearic Lizard, *Podarcis lilfordi* (Günther 1874) Suggests Anthropogenic Selective  
983 Pressures. *Herpetological Monographs*, 35(1).  
984 <https://doi.org/10.1655/HERPMONOGRAPHS-D-19-00005>
- 985 Rotger, A., Igual, J. M., Smith, J. J., & Tavecchia, G. (2016). Relative role of population density  
986 and climatic factors in shaping the body growth rate of lilford's wall lizard (*Podarcis*  
987 *lilfordi*). *Canadian Journal of Zoology*, 94(3), 207–215. <https://doi.org/10.1139/cjz-2015-0188>
- 988  
989 Rotger, A., Igual, J. M., & Tavecchia, G. (2020). Contrasting size-dependent life history  
990 strategies of an insular lizard. *Current Zoology*, 66(6), 625–633.  
991 <https://doi.org/10.1093/CZ/ZOAA019>
- 992 Rowe, M., Veerus, L., Trosvik, P., Buckling, A., & Pizzari, T. (2020). The Reproductive  
993 Microbiome: An Emerging Driver of Sexual Selection, Sexual Conflict, Mating Systems,  
994 and Reproductive Isolation. In *Trends in Ecology and Evolution* (Vol. 35, Issue 3, pp. 220–  
995 234). Elsevier Ltd. <https://doi.org/10.1016/j.tree.2019.11.004>
- 996 Salvador, A. (2009). *ENCICLOPEDIA VIRTUAL DE LOS VERTEBRADOS ESPAÑOLES*  
997 *Sociedad de Amigos del MNCN-MNCN-CSIC Lagartija balear-Podarcis lilfordi* (Günther,  
998 1874). <http://www.vertebradosibericos.org/>
- 999 Santamaría, S., Enoksen, C. A., Olesen, J. M., Tavecchia, G., Rotger, A., Igual, J. M., &  
1000 Traveset, A. (2019). Diet composition of the lizard *Podarcis lilfordi* (Lacertidae) on 2 small  
1001 islands: an individual-resource network approach. *Current Zoology*, May, 1–11.  
1002 <https://doi.org/10.1093/cz/zoz028>
- 1003 Segata, N., Izard, J., Waldron, L., Gevers, D., Miropolsky, L., Garrett, W. S., & Huttenhower, C.  
1004 (2011). *Metagenomic biomarker discovery and explanation*. [https://doi.org/10.1186/gb-](https://doi.org/10.1186/gb-2011-12-6-r60)  
1005 [2011-12-6-r60](https://doi.org/10.1186/gb-2011-12-6-r60)
- 1006 Shapira, M. (2016). Gut Microbiotas and Host Evolution: Scaling Up Symbiosis. In *Trends in*  
1007 *Ecology and Evolution*. <https://doi.org/10.1016/j.tree.2016.03.006>
- 1008 Smits, S. A., Leach, J., Sonnenburg, E. D., Gonzalez, C. G., Lichtman, J. S., Reid, G., Knight,  
1009 R., Manjurano, A., Changalucha, J., Elias, J. E., Gloria Dominguez-Bello, M., &  
1010 Sonnenburg, J. L. (2017). Seasonal cycling in the gut microbiome of the Hadza hunter-  
1011 gatherers of Tanzania. *Science*, 357, 802–806. <https://www.science.org>
- 1012 Sommer, F., Stå, M., Ilkayeva, O., Newgard, C. B., Frö, O., Bäckhed Correspondence, F.,  
1013 Arnemo, J. M., Kindberg, J., Josefsson, J., & Bäckhed, F. (2016). The Gut Microbiota

- 1014 Modulates Energy Metabolism in the Hibernating Brown Bear *Ursus arctos*. *Cell Reports*,  
1015 14. <https://doi.org/10.1016/j.celrep.2016.01.026>
- 1016 Song, J., Amir, A., Metcalf, J. L., Amato, K. R., Xu, Z. Z., Humphrey, G., Knight, R., &  
1017 Dearing, E. M. D. (2016). *Preservation Methods Differ in Fecal Microbiome Stability,*  
1018 *Affecting Suitability for Field Studies* Downloaded from.  
1019 <https://doi.org/10.1128/mSystems.00021-16>
- 1020 Terrasa, B., Pérez-Mellado, V., Brown, R. P., Picornell, A., Castro, J. A., & Ramon, M. M.  
1021 (2009). Foundations for conservation of intraspecific genetic diversity revealed by analysis  
1022 of phylogeographical structure in the endangered endemic lizard *Podarcis lilfordi*. *Diversity*  
1023 *and Distributions*, 15(2), 207–221. <https://doi.org/10.1111/j.1472-4642.2008.00520.x>
- 1024 Thaiss, C. A., Zmora, N., Levy, M., & Elinav, E. (2016). The microbiome and innate immunity.  
1025 In *Nature* (Vol. 535, Issue 7610, pp. 65–74). Nature Publishing Group.  
1026 <https://doi.org/10.1038/nature18847>
- 1027 Tung, J., Barreiro, L. B., Burns, M. B., Grenier, J. C., Lynch, J., Grieneisen, L. E., Altmann, J.,  
1028 Alberts, S. C., Blekhman, R., & Archie, E. A. (2015). Social networks predict gut  
1029 microbiome composition in wild baboons. *ELife*, 2015(4), 1–18.  
1030 <https://doi.org/10.7554/eLife.05224>
- 1031 van Damme, R. (1999). Evolution of Herbivory in Lacertid Lizards: Effects of Insularity and  
1032 Body Size. *Journal of Herpetology*, 33(4), 663–674.
- 1033 Velo-Antó, G., Zamudio, K. R., & Cordero-Rivera, A. (2012). Genetic drift and rapid evolution  
1034 of viviparity in insular fire salamanders (*Salamandra salamandra*). *Heredity*, 108, 410–418.  
1035 <https://doi.org/10.1038/hdy.2011.91>
- 1036 Warne, R. W., Kirschman, | Lucas, & Zeglin, L. (2019). Manipulation of gut microbiota during  
1037 critical developmental windows affects host physiological performance and disease  
1038 susceptibility across ontogeny. *J Anim Ecol*, 88. <https://doi.org/10.1111/1365-2656.12973>
- 1039 Youngblut, N. D., Reischer, G. H., Walters, W., Schuster, N., Walzer, C., Stalder, G., Ley, R. E.,  
1040 & Farnleitner, A. H. (2019). Host diet and evolutionary history explain different aspects of  
1041 gut microbiome diversity among vertebrate clades. *Nature Communications*, 10(1).  
1042 <https://doi.org/10.1038/s41467-019-10191-3>
- 1043 Zhang, W., Li, N., Tang, X., Liu, N., & Zha, W. (2018). Changes in intestinal microbiota across  
1044 an altitudinal gradient in the lizard *Phrynocephalus vlangalii* | Enhanced Reader. *Ecology*  
1045 *and Evolution*, 8, 4695–4703. <https://doi.org/10.1002/ece3.4029>
- 1046

1047

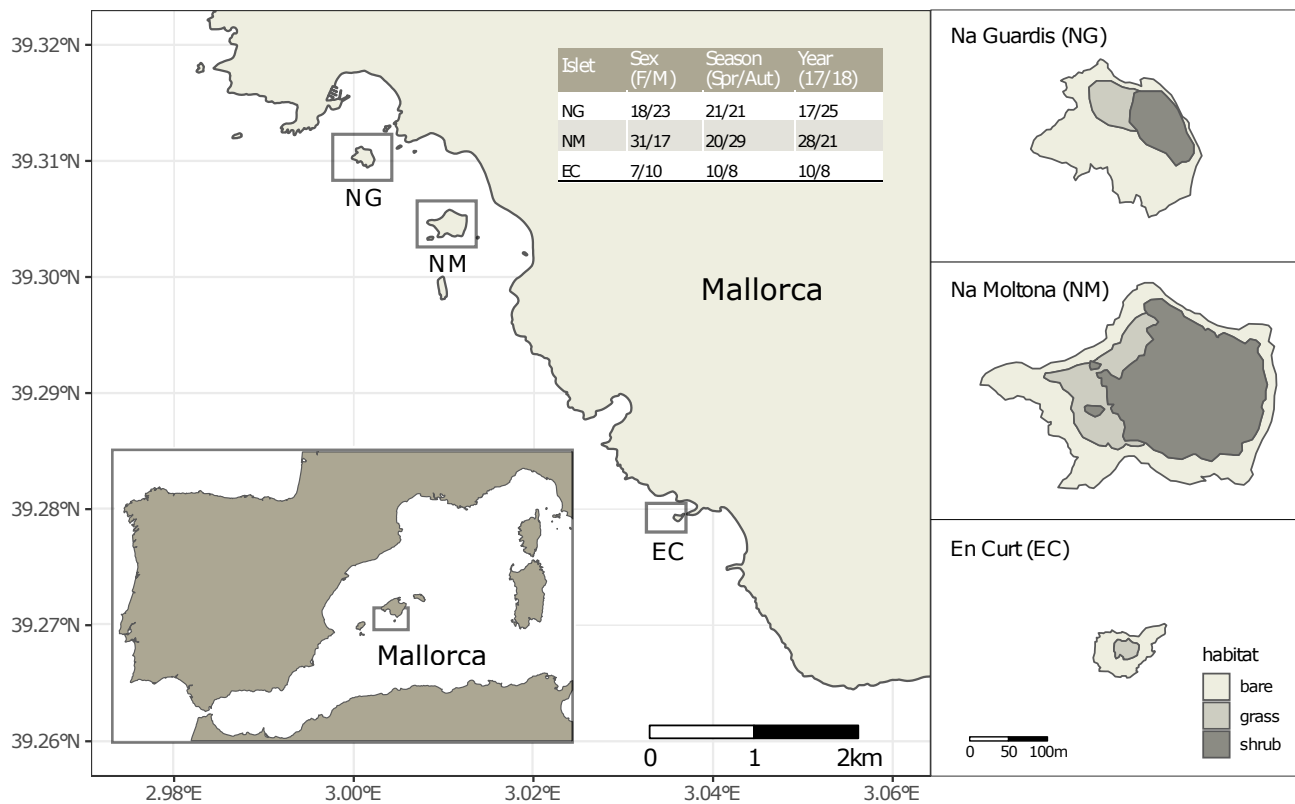

**Figure 1:** Location of the three islets under study and sample statistics. The table lists the number of fecal samples per sex (females and males, without including one unsexed juvenile per islet), season (spring and autumn) and year (2017 and 2018). See Supporting Information, Table S1, for sample metadata.

**Table 1:** Results of PERMANOVA (9999 permutations). All tests are marginal.

---

|                             | <b>Df</b> | <b>Sum of squares</b> | <b>R<sup>2</sup></b> | <b>pseudo F</b> | <b>Pr(&gt;F)</b> |
|-----------------------------|-----------|-----------------------|----------------------|-----------------|------------------|
| <i>a) Entire dataset</i>    |           |                       |                      |                 |                  |
| Sex                         | 2         | 0.658                 | 0.0183               | 1.1061          | 0.1197           |
| Year                        | 1         | 0.376                 | 0.0104               | 1.2641          | 0.0449           |
| Islet:Season                | 2         | 0.998                 | 0.0277               | 1.6778          | <b>0.0001</b>    |
| Islet:Life_Stage            | 6         | 2.099                 | 0.0583               | 1.1759          | <b>0.0050</b>    |
| Residual                    | 94        | 27.970                | 0.7760               |                 |                  |
| Total                       | 108       | 36.043                | 1                    |                 |                  |
| <i>b) Without juveniles</i> |           |                       |                      |                 |                  |
| Sex                         | 1         | 0.309                 | 0.0095               | 1.0432          | 0.2876           |
| Life_Stage                  | 1         | 0.309                 | 0.0095               | 1.0433          | 0.2957           |
| Year                        | 1         | 0.379                 | 0.0117               | 1.2818          | 0.0396           |
| Islet:Season                | 2         | 1.050                 | 0.0323               | 1.7744          | <b>0.0002</b>    |
| Residual                    | 91        | 26.921                | 0.8270               |                 |                  |
| Total                       | 99        | 32.552                | 1                    |                 |                  |

---



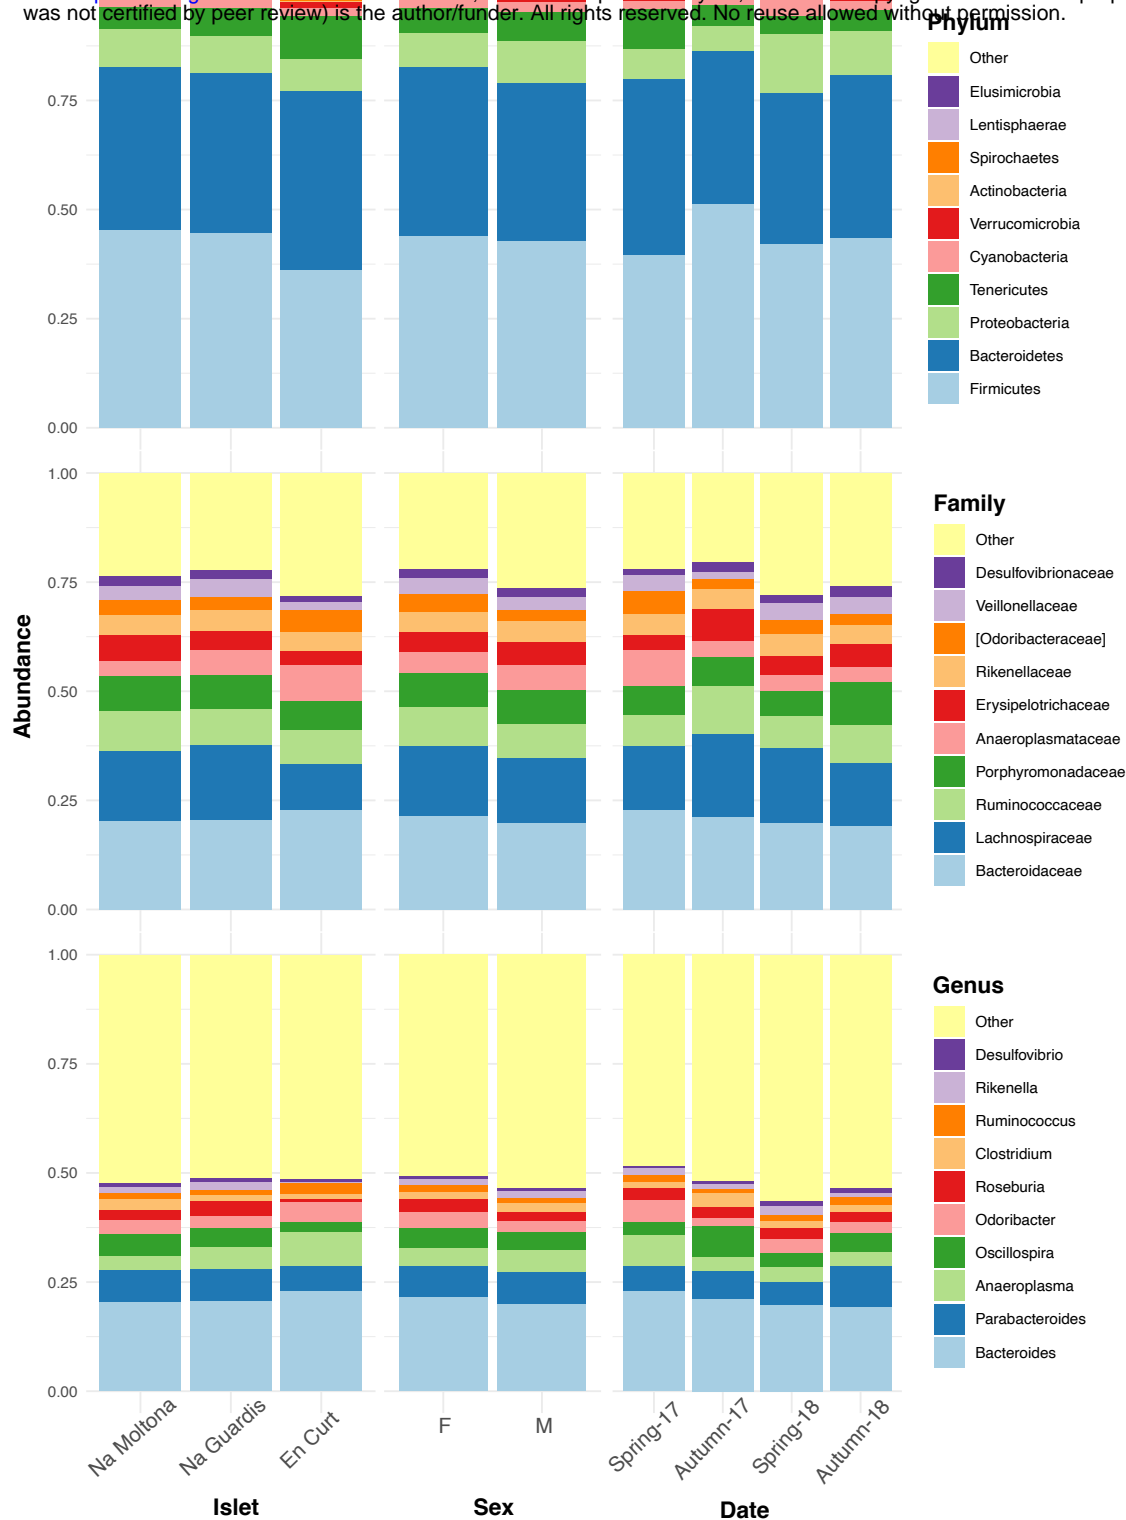

**Figure 2:** Taxonomic composition of the *P. lilfordi* gut microbiota at phylum, family, and genus levels according to “islet”, “sex” and sampling “date” (season-year). Juveniles (n = 9) were excluded. The legends list only the top 10 taxa (all remaining taxa were included in “Others”). For individual specimen taxonomic profile see Supporting Information, Figure S2. No major taxonomic differences were observed as a function of any of the variables.



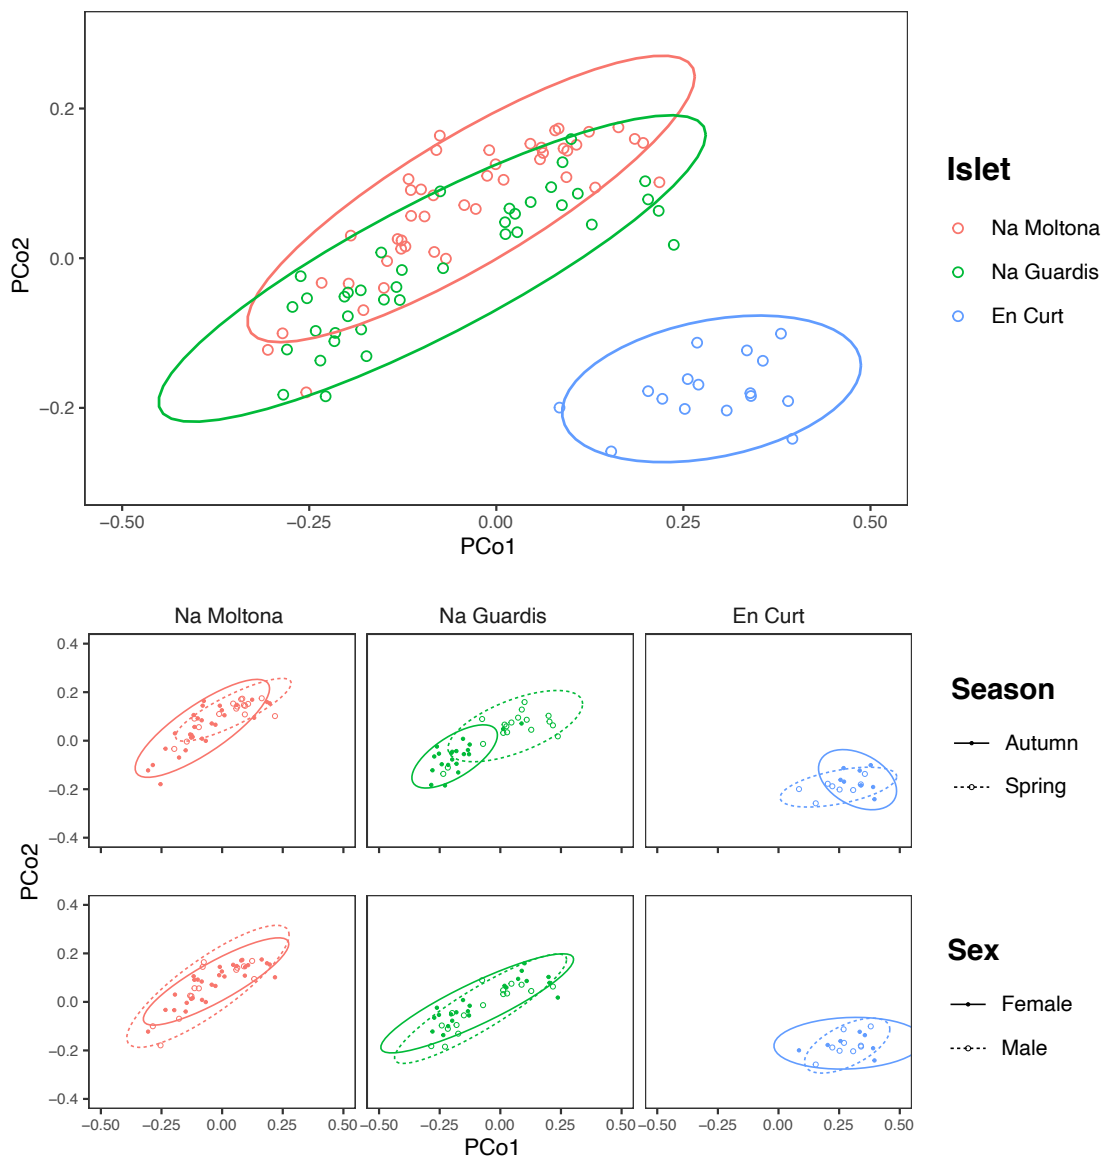

**Figure 3:** PCoA based on Bray-Curtis distances of the *P. lilfordi* gut microbiota depicting diversity among populations (“islets”) and within populations, according to “season” and “sex”. Dots represent specimens. Juveniles (n = 9) were excluded. Ellipses (calculated with `stat_ellipse` in `ggplot2`) enclose 95% of the expected values around centroids assuming a *t* distribution. Data were square root transformed. Microbiota differences were driven by “islet”, “season” (within each islet), but not “sex”.

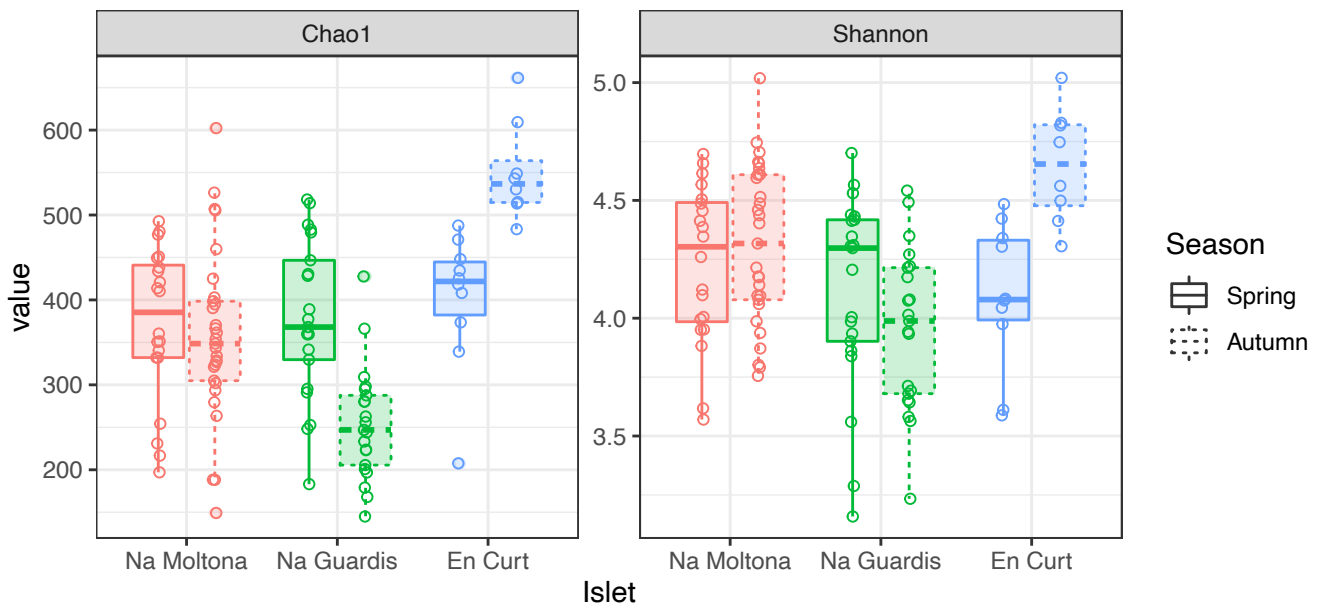

**Figure 4:** Gut microbiota alpha diversity by islet according to Chao1 and Shannon, estimated on seasonal datasets. Differences among islets are observed only for the autumn dataset.

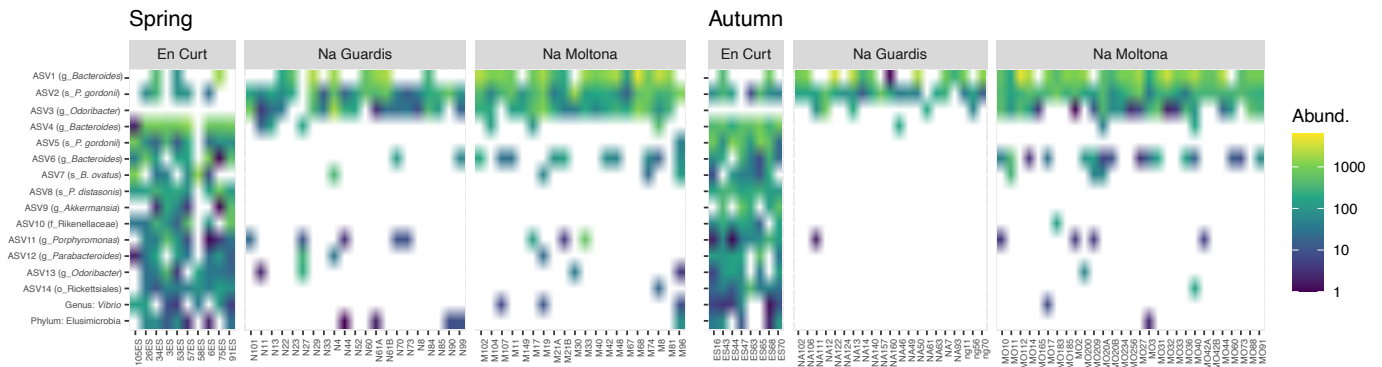

**Figure 5:** Heatmap of the microbial markers (14 ASVs and two taxa) driving differences across islets, consistently in spring and autumn. Pattern of ASV relative abundance per specimen (x axis, ordered by their mean abundances in spring) is highly concordant between seasons, despite the datasets include different sets of individuals. Heatmaps were built on log-transformed data grouped by islet and season. Data were restricted to ASVs and taxa retrieved by both indavl and LEfSe approaches (for indavl, relfreq  $\geq 0.6$  and  $p < 0.01$ ; for LEfSe LDA  $> 3$  and  $p < 0.01$ ). See Supporting Information, Table S4 for full taxonomic classification and statistics.

A

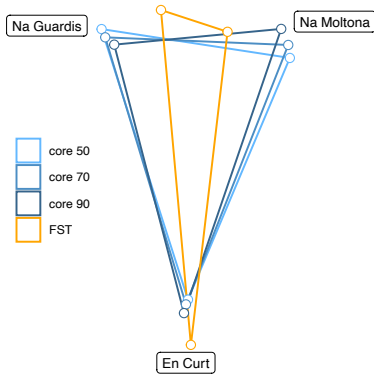

B

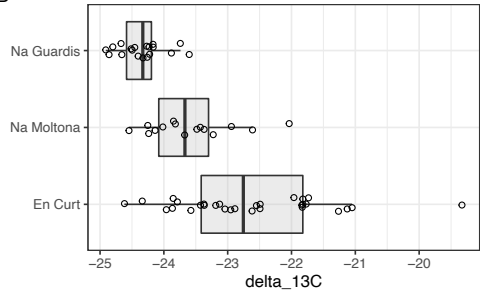

C

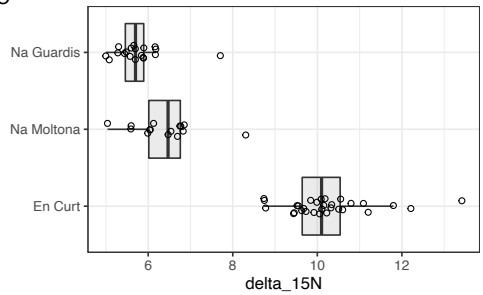

**Figure 6:** Host genetic and gut microbiota distances among the three islets/populations (A) and host trophic niches (B). A) Superimposed map of microbiota centroids distances (Bray-Curtis) per islet calculated on different core subsets, and host population genetics distance based on *Fst* values estimated on available microsatellites from a previous study (pairwise *Fst*, EC-NM: 0.135, EC-NG: 0.144, NM-NG: 0.03,  $p=0.001$  for all pairwise) (Rotger et al., 2021). See Supporting Information, Figure S3 for results based on Unifrac distances). B) Stable isotopes estimated for each population based on a dataset from spring 2016 (Supporting Information, Table S5). EC displayed higher values of both carbon-13 and particularly of nitrogen-15, with minor differences among NM and NG. The relative distances among islets according to host genetics, trophic ecology and gut microbiota are highly congruent.

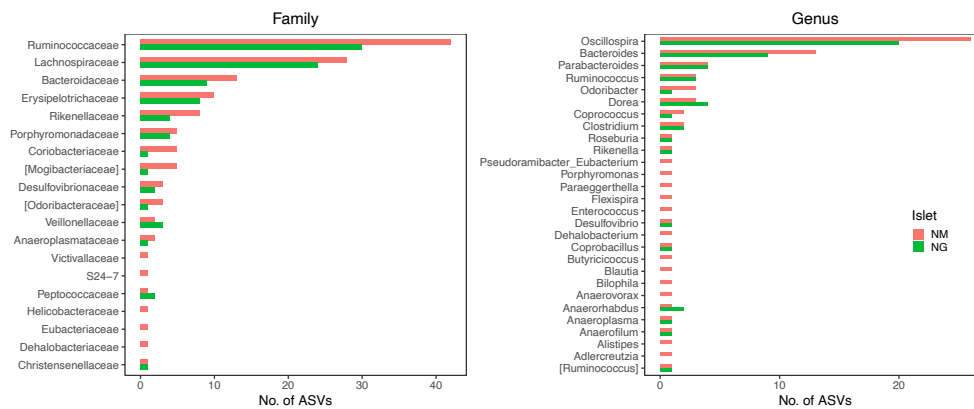

**Figure 7:** Family and genus-level taxonomic profile of persistent ASVs retrieved along the four sampling dates. The bars indicate the frequency of ASV per each taxon. The two islets shared a highly similar taxonomic profile.

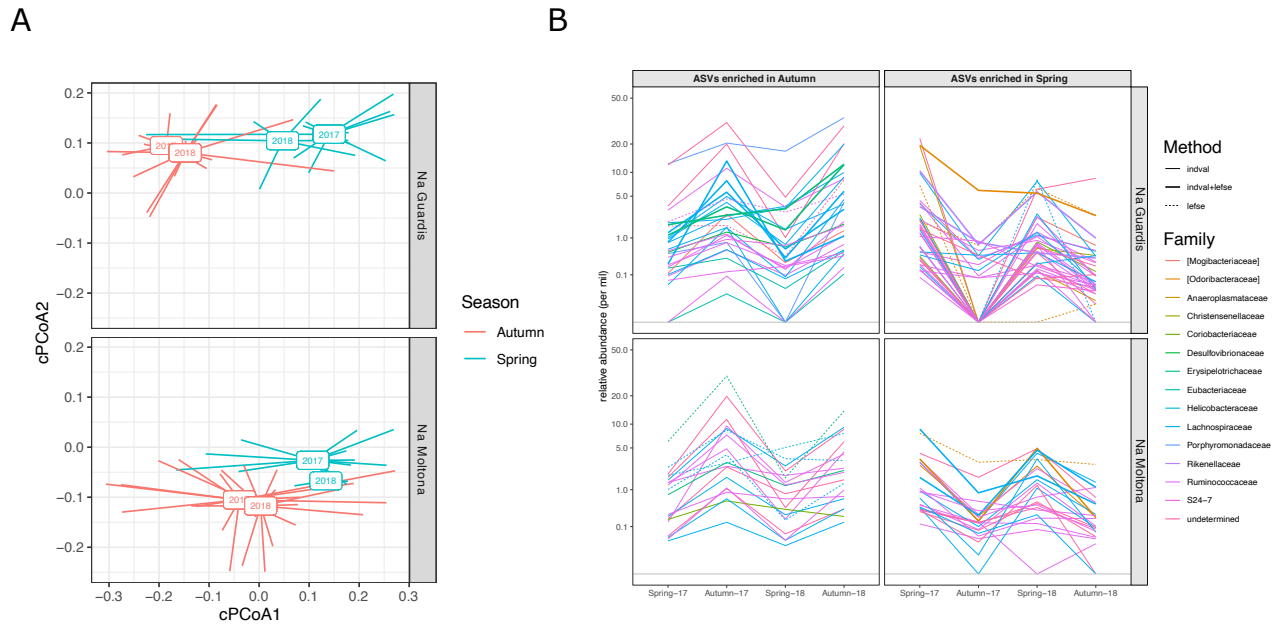

**Figure 8:** Microbiota seasonal changes (spring and autumn) in NG and NM along two years sampling (2017-18). A) PCoA based on Bray-Curtis distances on square root transformed values. Square boxes depict centroids for each year and season, with lines connecting centroids with individual observations. Microbiota configuration changes across seasons in a repetitive manner and consistently in the two populations. Results were robust to the use of different core subsets (see Supporting Information, Figure S5). B) Variation in mean relative abundance along “dates” of ASVs that were significantly enriched in either spring or autumn according to LefSe and/or indval analyses. A clear pattern of seasonal fluctuations can be observed for most ASVs, with the majority belonging to the families Ruminococcaceae and Lachnospiraceae. A total of 20 ASVs (NG) and 11 ASVs (NM) were consistently retrieved by both methods (see also Supporting Information, Table S8).
